# Supplementary material for: Unintended consequences of combating desertification in China
Source: PubMed Central journal article supplement (PMC9975221; doi:10.1038/s41467-023-36835-z), 2023-02-28
Supplement: 41467_2023_36835_MOESM1_ESM.pdf [file 41467_2023_36835_MOESM1_ESM.pdf]

# Supplementary Information for:

## Unintended consequence of combating desertification in China

### Contents

Supplementary Note 1 *Desertification-prone region (DPR) in China*

Supplementary Note 2 *“Grain-for-green” and grazing exclusion practices in China*

Supplementary Note 3 *Constructed fractional vegetation coverage (FVC) dataset*

Supplementary Note 4 *Trend of climate change and FVC*

Supplementary Note 5 *Field truthing and interpolation of CNLUCC*

Supplementary Figures 1~15

Supplementary Tables 1~13

### Supplementary Note 1 Desertification-prone region (DPR) in China

Desertification is defined as “land degradation in arid, semiarid, and dry subhumid areas resulting from various factors including climatic variations and human activities”<sup>1,2</sup>. From 1999 to the present, every five years, the State Forestry Administration of China (SFAC) has released a bulletin on the status quo of desertification and sandification in China; these bulletins summarize the water erosion, freeze-thaw, salinification, and aeolian desertification statuses of the nation<sup>3</sup>. However, these bulletins do not specify the monitoring criteria, and only the desertification classifications and the corresponding areas in different provinces are released. Based on bulletins released by relevant Chinese agencies, in 2014, the areas affected by water erosion, salinification, freeze-thaw cycles, and aeolian desertification were  $25.01 \times 10^4$ ,  $17.19 \times 10^4$ ,  $36.33 \times 10^4$ , and  $182.63 \times 10^4$  km<sup>2</sup>, respectively<sup>4</sup>.

However, there are differences in the desertification classification schemes applied by different researchers in China and by SFAC. In China, water erosion and freeze-thaw events mainly occur on the Chinese Loess Plateau<sup>5</sup> and the Qinghai-Tibet Plateau<sup>6</sup>, respectively. At present, the Chinese Loess Plateau is not regarded as a typical desertification region<sup>7</sup>, and under the context of global warming, freeze-thaw events on the Qinghai-Tibet Plateau have positive effects on vegetation growth<sup>8</sup>. Therefore, no severe desertification issues currently exist in either of these regions, and most researchers in China do not regard water erosion, freeze-thaw events or the resulting ecological, environmental and food security issues as consequences of desertification. In addition, although salinification also occurs in parts of arid, semiarid, and semihumid regions and is one form of desertification<sup>9</sup>, the reversal of salinification resulting from a decreased groundwater level<sup>10-12</sup> and the limited area affected by salinification ( $\sim 17 \times 10^4$  km<sup>2</sup>) means that salinification is not considered a serious desertification issue and does not significantly affect the ecological environment or food security in China. Due to the exceptionally large

33 affected area ( $\sim 184 \times 10^4 \text{ km}^2$ , comprising  $\sim 90\%$  of the desertification-prone area in China), ‘aeolian  
34 desertification’ is usually regarded as a kind of desertification. This process is formally defined as “the destruction  
35 of an ecological balance as a result of excessive human activities under conditions characterized by high wind  
36 activity in regions with sandy surface sediments, accompanied by evidence of intensifying wind activity occurring  
37 simultaneously with land degradation”<sup>13-15</sup>.

38 Desertification-prone regions are mainly covered by sandy lands, the ecological landscapes of which are similar  
39 to those of grasslands and steppe regions, as has been noted in various vegetation classification schemes<sup>16,17</sup>  
40 developed for the arid, semiarid and semihumid regions of China. Under the condition that the underlying soils  
41 consist mainly of sands (particles of 0.05-2 mm in diameter), these landscapes are referred to as ‘sandy lands’;  
42 according to the vegetation coverage, these areas can be further classified as mobile, semimobile, semianchored,  
43 and anchored sandy lands. The Gobi Desert is defined as “wide, shallow basins with smooth rocky bottoms filled  
44 with sand, silt or clay, pebbles or, more often, with gravel”<sup>18</sup>; the land surface of the Gobi Desert is usually covered  
45 by a layer of coarse sands or gravels ( $>0.5 \text{ mm}$  in diameter) with very low vegetation coverage ( $<5\%$ )<sup>19</sup>. If the  
46 vegetation coverage or productivity of sandy lands/the Gobi Deserts decreases, desertification occurs. From the  
47 historical period to the present, several sandy lands have been reclaimed and have become major grain production  
48 areas in China<sup>20-22</sup>, and nearly all of the sandy lands have been used for animal grazing<sup>23</sup>. Although the intensity  
49 of human activity in the Gobi Desert is extremely low<sup>24</sup>, due to the extremely low productivity of this region<sup>25-27</sup>,  
50 desertification in such areas is usually not considered<sup>17</sup>. According to the above definition, we compiled the spatial  
51 distributions of the DPR (Supplementary Fig. 1) and counted the land use types (Supplementary Fig. 6),  
52 population, GDP (Supplementary Fig. 11), grain production, livestock production, and related income of  
53 individuals (Supplementary Fig. 7) in the DPR. The recent (2015-2019) specific economic situation of the DPR  
54 is shown in Supplementary Table 1.

55

## 56 **Supplementary Note 2 “Grain-for-green” and grazing exclusion practices in China**

57 Since the late 1970s, and especially from the early 2000s to the present, multiple desertification-combating  
58 programmes, mainly including the “Natural Forest Protection”, “Great Green Wall”, “Returning Farmland to  
59 Forest/Grassland”, “Pasturing Prohibition”, and “Beijing-Tianjin Sandstorm Source Control” programmes, have  
60 been launched to combat desertification, control dust storms, and improve the ecological environments in the  
61 DPR of China (Supplementary Tables 1, 11). Although diverse countermeasures are employed in each programme,  
62 the major countermeasures of these programmes can be roughly divided into two categories: returning farmlands  
63 to forests/grasslands and afforestation (“grain-for-green” practices), and grazing exclusion practices. Following  
64 the practices of these programmes, the Chinese government invested some money (Supplementary Table 1), a

65 portion of which was paid to farmers and herders (Supplementary Table 6). In addition, following the government  
66 plan, in the near future, “grain-for-green” and grazing exclusion practices are expected to continue  
67 (Supplementary Table 2).

68 However, there are no official details regarding limited or banned regions and land use types covered by the  
69 “grain-for-green” and grazing exclusion practices; therefore, we identified these regions and land use types based  
70 on multiple-period land use data by referring to the relevant legal literature, and acquired the proportions of DPR  
71 areas in each province related to the two practice types (Supplementary Fig. 3). Then, we applied a statistical  
72 framework to identify the contributions of climate change and the two practice types to vegetation restoration in  
73 the DPR (Supplementary Fig. 9) and calculated the production and income losses induced by the two practice  
74 types in the DPR (Supplementary Fig. 4; Supplementary Table 4).

### 75 76 **Supplementary Note 3 Construction of the fractional vegetation coverage (FVC) dataset**

77 We used the long-term, continuous NDVI dataset of the Blended Vegetation Health Product (VH NDVI) and 250-  
78 m MODIS NDVI data to construct the FVC dataset. The VH NDVI product (for 1982-2018), which has a spatial  
79 resolution of 4 km and a temporal resolution of 7 days, was retrieved from the Visible Infrared Imaging  
80 Radiometer Suite (VIRS) (available since 2013) and Advanced Very-High-Resolution Radiometer (AVHRR,  
81 available from 1982 to 2012) land surface data ([ftp://ftp.star.nesdis.noaa.gov/pub/corp/scsb/wguo/data/  
82 Blended\\_VH\\_4km/VH/](ftp://ftp.star.nesdis.noaa.gov/pub/corp/scsb/wguo/data/Blended_VH_4km/VH/)). Sixteen-day composite 250-m MODIS NDVI values were derived from the MOD13Q1  
83 Terra Vegetation Indices ([https://ladsweb.modaps.eosdis.nasa.gov/missions-and-measurements/products/  
84 MOD13Q1](https://ladsweb.modaps.eosdis.nasa.gov/missions-and-measurements/products/MOD13Q1)), which has been available since 2000.

85 To match the temporal resolution of the MODIS and VH NDVI datasets, a dataset with a spatial resolution of half  
86 a month was composited using the maximum value composite (MVC) method. Before resampling, missing data  
87 in the MODIS and VH NDVI dataset were compensated using the nearest value at the temporal scale. When the  
88 monthly VH NDVI data is less than 4 periods, the nearest time data is used as substitute. Meanwhile, in order to  
89 maintain the continuity of monthly scale data, the MVC was used to generate NDVI for the two periods of the  
90 upper and the second half of the month respectively. This work ensures that the two sets of data have 24 periods  
91 per year. To construct a high-quality MODIS data map, median filter technology<sup>28,29</sup> was used to smooth the  
92 MODIS NDVI profiles. Then, based on the Quality Control (QC) information for MODIS NDVI  
93 ([http://lpdaac.usgs.gov/modis/qa/mod13a2\\_qa\\_v5.asp](http://lpdaac.usgs.gov/modis/qa/mod13a2_qa_v5.asp)), NDVI values derived using the main radiative transfer  
94 method ( $Q < 3$ ) were retained, while those derived using the empirical method due ( $Q \geq 3$ ) to geometric  
95 incompatibility or other problems were excluded and replaced by the filtered values. Due to the large spatial  
96 heterogeneity of the start and end times of the growing season in the DPR, the accumulated annual NDVI was

97 used to reflect vegetation growth characteristics. The annual NDVI value was calculated as follows:

$$98 \quad NDVI_{y,i} = \sum_{m=1}^{m=24} NDVI_{m,i} \quad (1)$$

$$99 \quad NDVI_{m,i} > 0 \quad (2)$$

100 where  $NDVI_{m,i}$  is the NDVI value of the  $i_{th}$  grid point at the  $m_{th}$  time and  $NDVI_{y,i}$  is the annual NDVI value  
 101 of the corresponding grid point. To match the spatial resolution and timespan of the MODIS dataset in the DPR,  
 102 annual VH NDVI data for 1982-2018 were resampled to a 250-m spatial resolution using the bilinear interpolation  
 103 method to provide information about the distribution of vegetation and help reduce the probability of non-  
 104 vegetation being treated as plants in the constructed NDVI (CD NDVI) datasets. Therefore, based on the NDVI  
 105 data sources and methods described above, the constructed NDVI dataset (CD NDVI) was created, and the annual  
 106 value of NDVI value could be calculated as follow:

$$107 \quad ANDVI_{M,ix,jx} = \frac{\sum_{y=2000}^{y=2018} NDVI_{M,y,ix,jx}}{19} \quad (3)$$

$$108 \quad ANDVI_{B,ix,jx} = \frac{\sum_{y=2000}^{y=2018} NDVI_{B,y,ix,jx}}{19} \quad (4)$$

$$109 \quad V_{ix,jx} = \frac{ANDVI_{B,ix,jx}}{ANDVI_{M,ix,jx}} \quad (5)$$

$$110 \quad NDVI_{ix,jx} = \left( 1 + \frac{NDVI_{B,ix,jx} - ANDVI_{M,ix,jx}}{ANDVI_{M,ix,jx}} \right) \times \frac{NDVI_{B,ix,jx}}{V_{ix,jx}}, \quad i < ix, j < jx \quad (6)$$

$$111 \quad i = h + ix \cdot \Delta_i, h < \Delta_i \quad (7)$$

$$112 \quad j = v + jx \cdot \Delta_j, v < \Delta_j \quad (8)$$

113 where  $i$  (or  $ix$ ) and  $j$  (or  $jx$ ) refer to pixel in the  $i_{th}$  (or  $ix$ ) row and  $j_{th}$  (or  $jx$ ) column in the image data,  
 114 respectively.  $\Delta_i$  is  $\frac{ix}{i}$ ;  $\Delta_j$  is  $\frac{jx}{j}$ .  $NDVI_B$  refers to the VH NDV,  $NDVI_M$  refers to the MODIS NDVI, and  
 115  $ANDVI$  is the annual NDVI value. Then, we reproduced a 250-m-resolution FVC dataset (CD FVC) using the  
 116 improved pixel bipartite model for the 1982-2018 period (see Methods).

117 To test the robustness of the CD NDVI and FVC dataset, we used the GIMMS3g NDVI  
 118 (<https://iridl.ldeo.columbia.edu/SOURCES/.NASA/.ARC/.ECOCAST/.GIMMS/.NDVI3g/.v1p0/>) and SPOT  
 119 NDVI (<https://land.copernicus.vgt.vito.be/PDF/portal/Application.html#Browse;Root=513186>) datasets to  
 120 construct VH, GIMMS3g, SPOT, and MODIS FVC data series. First, because assessing the consistency of the  
 121 spatiotemporal variation trends is an effective method for verifying the quality of data from different sources<sup>30,31</sup>,  
 122 we compared the CD NDVI with the VH, GIMMS3g, SPOT, and MODIS NDVI data from 2000-2013. The results  
 123 show that although, from 2000 to 2013, the average CD NDVI value ( $1.91 \pm 0.15$ , mean  $\pm 1$  standard deviation)  
 124 was 0.51 and 0.39 times higher than that of GIMMS3g and SPOT NDVI, respectively, all of the NDVI datasets  
 125 showed significant increasing trends on the annual scale ( $P < 0.01$ ) (Supplementary Fig. 13). This analysis  
 126 suggests that the annual variation trends of the five NDVI datasets were relatively consistent in the DPR. Secondly,

127 an intercomparison of the annual variation trends of the five NDVI datasets in different subregions in the DPR  
128 was performed. The results (Supplementary Fig. 14) also show that, at the annual scale for the nine subregions in  
129 the DPR, all of the NDVI datasets exhibit increasing trends (with slopes >0), indicating that the variation trend  
130 of the CD NDVI is similar to the VH, GIMMS3g, and MODIS NDVI. Third, the zonal variation trends of the CD  
131 NDVI and MODIS NDVI from 2000-2018 (Supplementary Fig. 15a, b) also show a significant and consistent  
132 decreasing trend over the latitudinal range of 35.5° N - 42.5°N and an increasing trend over the range of 46.5°N  
133 - 50°N, suggesting that spatial consistency exists between these two datasets. Finally, the CD NDVI and MODIS  
134 NDVI were also highly correlated at both the zonal and pixel levels ( $R \geq 0.879$  ( $P < 0.001$ ) and  $\geq 0.564$  ( $P$   
135  $< 0.001$ ), respectively) (Supplementary Fig. 15c). Therefore, the CD NDVI dataset accurately quantified the  
136 spatial and temporal NDVI variations and was available for the entire DPR region. Using the methods described  
137 above, we also verified the reliability of the CD FVC data (Supplementary Fig. 8; Supplementary Table 8;  
138 Supplementary Table 9).

139

#### 140 **Supplementary Note 4 Climate change and FVC trends**

141 The temperature, precipitation, and FVC trends in the DPR of China from 1982-2018 are shown in Supplementary  
142 Fig. 5 and Supplementary Table 3. To assess the impacts of future climate and CO<sub>2</sub> change on vegetation  
143 restoration in the DPR, we obtained monthly output data from 21 commonly used GCMs spanning the period  
144 from 1982-2050 from the Earth System Grid Federation (ESGF, <https://esgf-node.llnl.gov/search/cmip6/>)  
145 (Supplementary Table 10). The time series of CMIP6 model outputs comprise two parts: 1) historical  
146 simulations (1982-2014) used for comparisons with the observed data and 2) ScenarioMIP simulations (2015-  
147 2050) that were used to show the future changes in the climate system under different SSP and RCP scenarios  
148 <sup>32,33</sup>. The SSP1-2.6, SSP2-4.5, and SSP5-8.5 scenarios are three of the scenarios commonly used in future  
149 projection assessments<sup>33</sup>, and thus were thus chosen in this work to analyse future FVC changes in the DPR. In  
150 addition, only the r11p1f1 simulations of the 21 GCMs were used here to ensure consistency among all of the  
151 output data<sup>34</sup>. In general, climate variables that may potentially affect vegetation growth include the precipitation,  
152 air temperature (mean, maximum, and minimum), solar irradiation, and wind, and therefore the monthly output  
153 data of these variables were used in this study.

154 In addition to climate factors, the fertilization effect of anthropogenic CO<sub>2</sub> increases can also favour vegetation  
155 growth and rehabilitation<sup>35,36</sup>; therefore the monthly atmospheric CO<sub>2</sub> concentration data during the historical  
156 (1981–2014) and future (2015–2100) periods under different scenarios were also used in this study. These data  
157 were generated by the simplified climate carbon cycle model (MagicC7.0)<sup>37</sup> at a longitudinal interval of 0.5°  
158 by the University of Melbourne (<https://greenhousegases.science.unimelb.edu.au/#!/view>).

159 Differences between GCM simulations and observed data occur because of uncertainties in initial fields, the  
160 depictions of physical processes, and the probabilities associated with climate systems. To address these  
161 differences and uncertainties, we used the delta change (DC) method modify the GCM simulations by removing  
162 the errors between the simulated and observed data<sup>38</sup> during the reference period of 1982–2014 at each weather  
163 station and then applied the correction to modify the simulated data during the period of 2015-2050 period:

$$164 \quad x_f^* = \mu_o + (x_f - \mu_m) \quad (10)$$

$$165 \quad x_f^* = \mu_o \times (x_f / \mu_m) \quad (11)$$

166 where the subscript f indicates the future;  $\mu_o$  and  $\mu_m$  are the means of the observed and model-simulated data,  
167 respectively; and  $x_f$  and  $x_f^*$  are the original and modified simulation data, respectively. Some of the variables  
168 (such as temperature) were modified using Equation 10, while other variables (e.g., precipitation) were modified  
169 using Equation 11. Then, we used a multiple model ensemble (MME) based on the average equal-weights GCMs  
170 as the input for the simulations to prevent potential errors resulting from using a single GCM.

171 The temperature and precipitation trends in the DPR of China from 2015 to 2050 were added to Supplementary  
172 Fig. 5 to facilitate a clear comparison. Then, we proposed an SMLR model for each pixel based on the reference  
173 period of the FVC and environmental factors data (the corresponding coefficient of determination is shown in  
174 Supplementary Fig. 10) and simulated the future trends from 2015-2050 under the SSP1-2.6, SSP2-4.5, and SSP5-  
175 8.5 scenarios from CMIP6 model experiments (Fig. 5; Supplementary Table 7).

176

#### 177 **Supplementary Note 5 Field truthing and interpolation of the CNLUCC data**

178 Mistakes in the characterization and positioning of patches due to operator misjudgements are inevitable  
179 accidental errors in visual interpretation work. Therefore, data teams have evaluated the accuracy of the reported  
180 land use data for each period by randomly sampling or sampling along the lines and comparing the actual and  
181 interpreted results at the sample points one-by-one using global positioning system (GPS) data<sup>39</sup>. At present, such  
182 validations have covered most regions and each period in China (e.g., Supplementary Table 12 shows the accuracy  
183 analysis results for Northeast China) and show that the overall accuracy of the dataset exceeds 90%<sup>40,41</sup>. Therefore,  
184 these data have been widely trusted and applied<sup>42,43</sup>.

185 To obtain the arable lands and livestock production per unit area of grasslands and farmlands from the country-  
186 level database covering the DPR from 1982-2020, we used CNLUCC data to extract the cultivated land and  
187 grassland areas in each county (district). As CNLUCC has only 8 years of data (1980, 1990, 1995, 2000, 2005,  
188 2010, 2015, and 2020), we built a linear regression model based on the available data and used this model to  
189 generate a complete time series via interpolation:

$$190 \quad Y = \alpha + \beta X + \varepsilon \quad (9)$$

191 where  $Y$  is the time series of the cultivated land and grassland areas,  $X$  is the year,  $\beta$  is the regression coefficient,  
192 and  $\varepsilon$  is the regression error or residual. A least-squares method was used to fit equation (1) and, subsequently,  
193 to estimate the missing data. The goodness of fit was assessed by the coefficient of determination ( $R^2$ )<sup>44</sup>.  
194 Cross-validation<sup>45</sup> was used to test the performance of the linear interpolation method filling the data gaps. For  
195 land use data, the validations showed that the average interpolation errors for 126 counties (representing 48.65%  
196 of the total) were within 10%, and 101 counties (39.00% of the total) had average interpolation errors of 10-20%  
197 (Supplementary Table 10). Given the classification errors in the land use data<sup>41</sup>, the results suggested that the  
198 linear interpolation method could reliably estimate the missing data. Table 1 lists the cross-validation results  
199 obtained for a randomly selected proportion of counties in 1995, 2005, and 2015. The missing socioeconomic  
200 data values are scattered, so the test results are not shown.

201

202

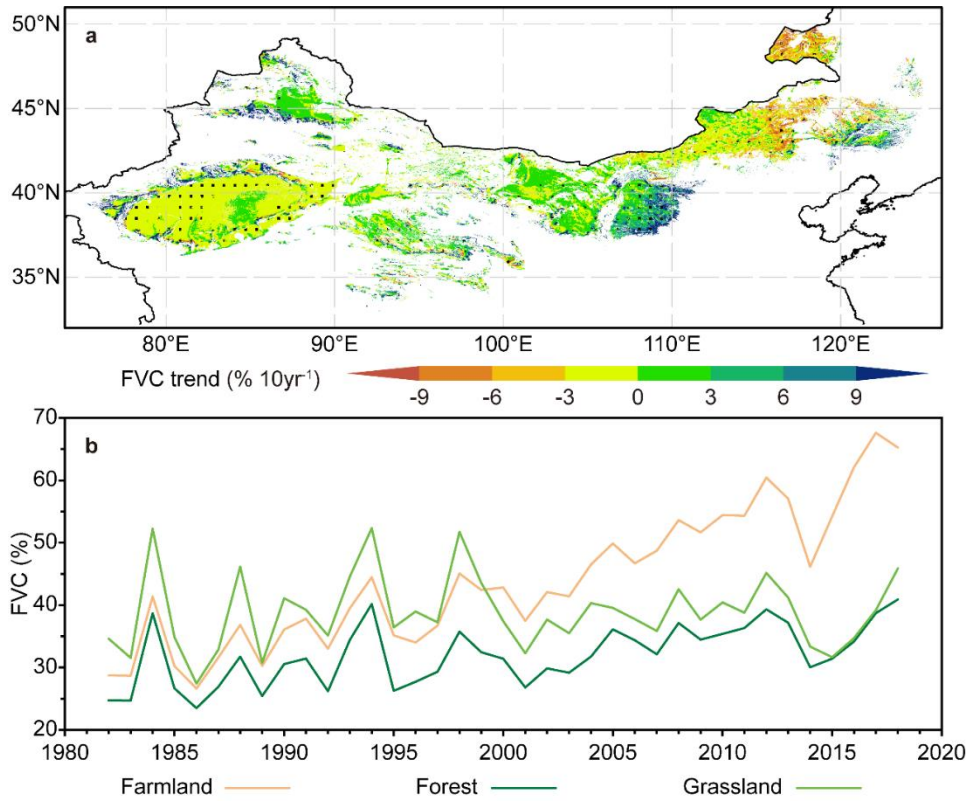

204

205 **Supplementary Fig. 1 Fractional vegetation cover (FVC) trends in the desertification-prone region of China during the 1982**  
 206 **to 2018.** a: Spatial patterns of the linear FVC trends; b: the annual average FVCs in farmlands, forests, and grasslands. The stippling  
 207 in panel (a) marks regions with significant trends (the Mann-Kendall test passed at the 95% significance level).

208

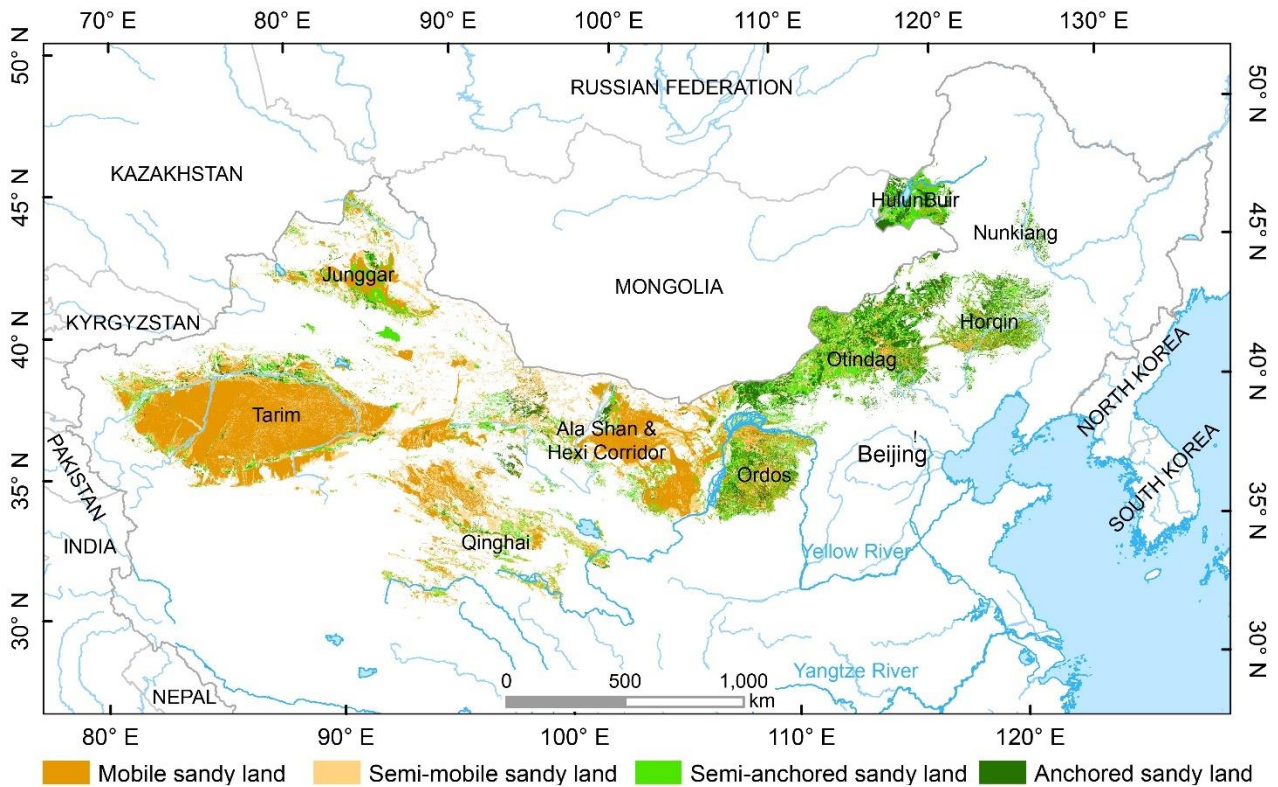

209

210

211

**Supplementary Fig. 2 Location and subregions of the desertification-prone region in China.**



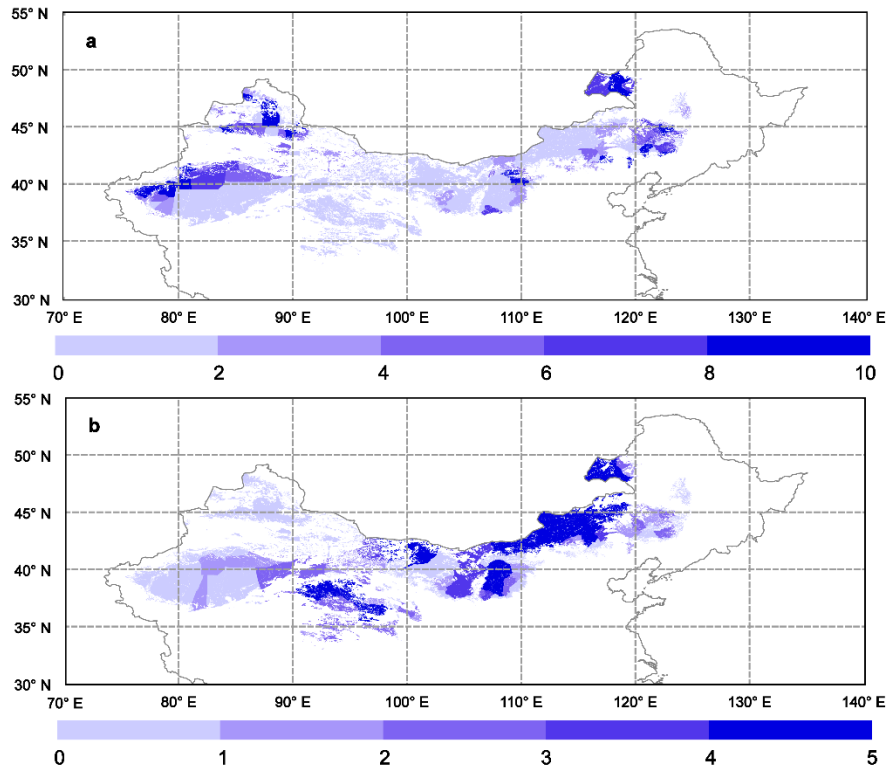

212

213

214

215

216

**Supplementary Fig. 3 County-level spatial distributions of combating desertification practices in the desertification-prone region since 2000.** a: cultivated land areas involved in “grain-for-green” practices ( $10^3$  ha); b: grassland areas involved in grazing exclusion practices ( $10^{-1}$  million ha). See the Methods section for more details.

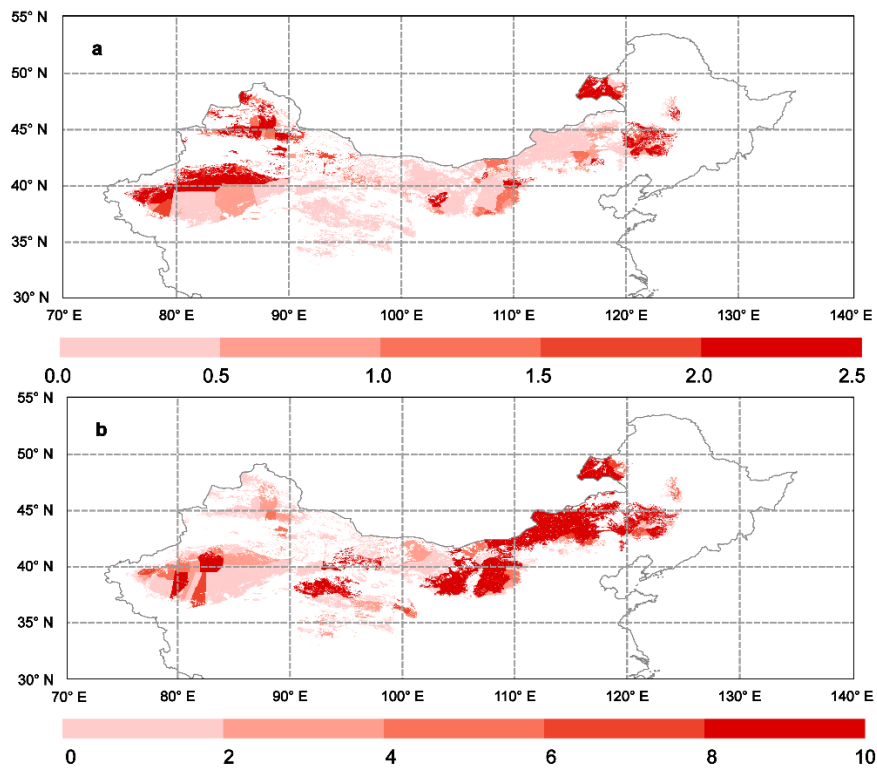

217

218

219

220

**Supplementary Fig. 4 County-level decreases in grain production and livestock production in the desertification-prone region of China since 2000.** a: grain production decreases ( $10^{-3}$  million tonnes); b: livestock production decreases ( $10^{-1}$  million standard sheep units).

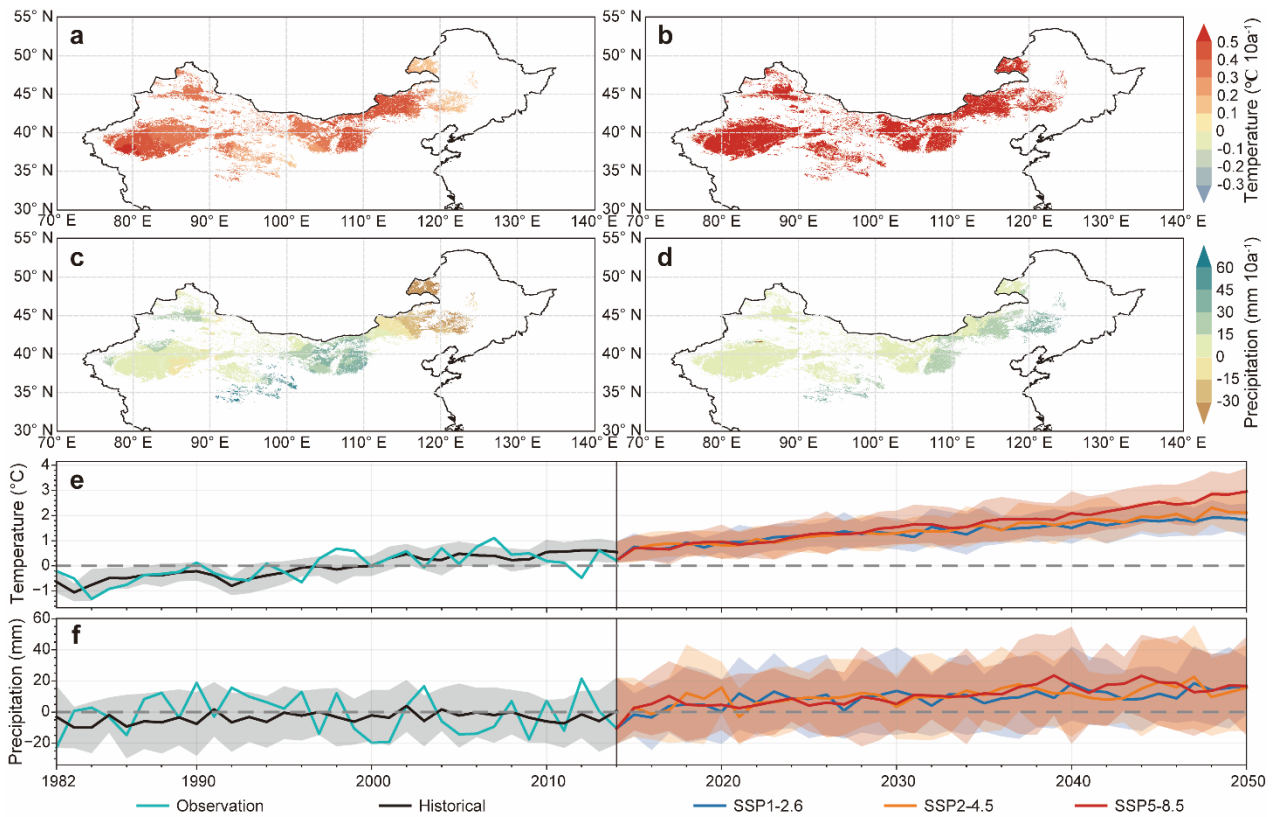

222

223

224

225

226

227

228

229

230

231

232

233

234

**Supplementary Fig. 5 Historical and future climate change trends in the desertification-prone region of China.** Spatial distributions of temperature (a) and precipitation (c) trends from 1982 to 2018 and spatial distributions of temperature (b) and precipitation (d) trends from 2015 to 2050. The trend lines from 1982 to 2050 are also provided (e, f). The values in panels (b) and (d) are the average values derived under different shared socioeconomic pathway (SSP) and representative concentration pathway (RCP) scenarios (i.e., SSP1-2.6, SSP2-4.5, and SSP5-8.5) from the Coupled Model Intercomparison Project Phase 6 (CMIP6) model experiments. All scenario simulations were modified by removing the errors between the CMIP6-simulated (the line referred to as Historical in panels (e,f)) and observed (the line referred to as Observation in panels (e,f)) data during the 1982-2014 reference period and the difference between the three scenarios in panels (e,f) shown since 2014. The widths of the bands in panels (e) and (f) indicate the standard deviations among the different global climate models. To compare present and future climate conditions more intuitively, the absolute climate values are replaced by anomaly values obtained based on climatic averages during the 1982 to 2015 period in panels (e) and (f). See Supplementary Note 4 for details about CMIP6 data processing.

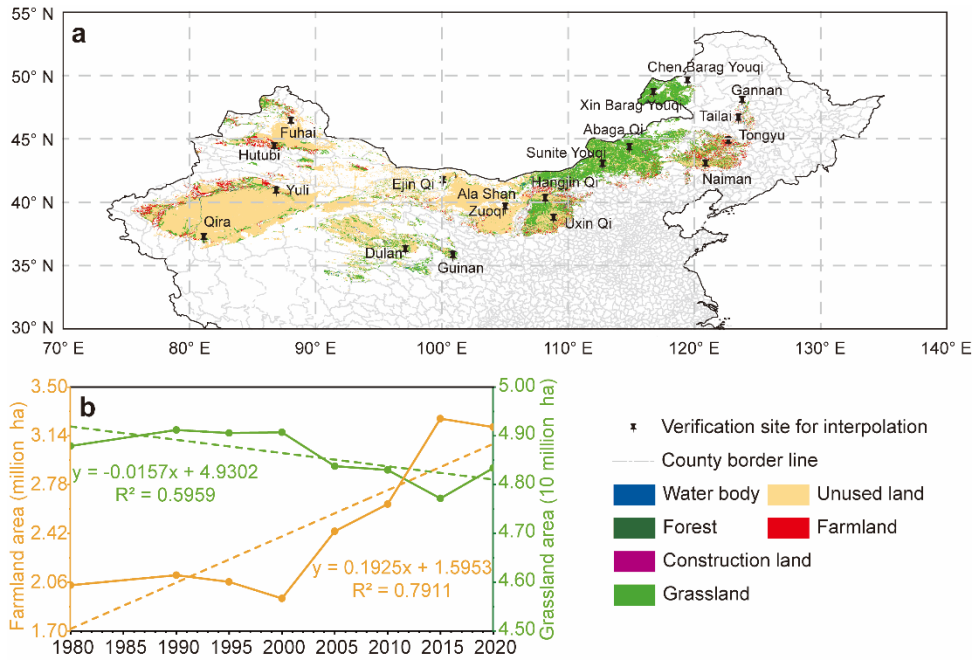

235  
 236 **Supplementary Fig. 6 Land use spatial pattern in 2020 (a) and area change trends during 1980 to 2020 (b) in the**  
 237 **desertification-prone region.** The information representing 1980, 1990, 1995, 2000, 2005, 2010, 2015 and 2020 was provided by  
 238 the Multi-Period Land Use Land Cover Remote Sensing Monitoring Dataset for China, and the other data were interpolated based  
 239 on the line trends. See Methods and Supplementary Note 5 for more details.

240

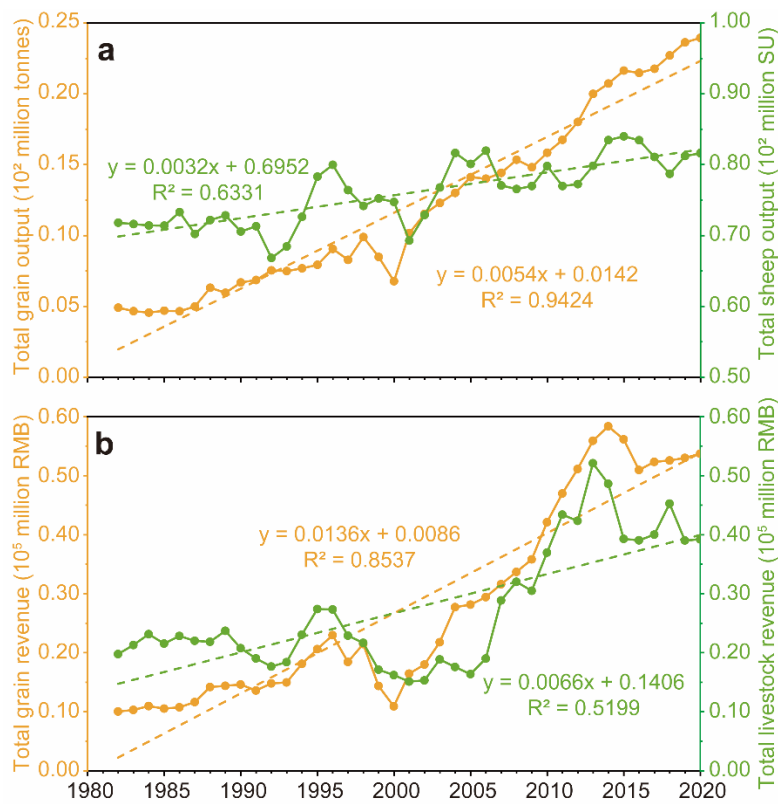

241  
 242 **Supplementary Fig. 7 Annual actual yields of grain and animal husbandry (a) and the resulting incomes (b) in the**  
 243 **desertification-prone region during 1982-2020.** 1 RMB  $\approx$  0.14 USD.

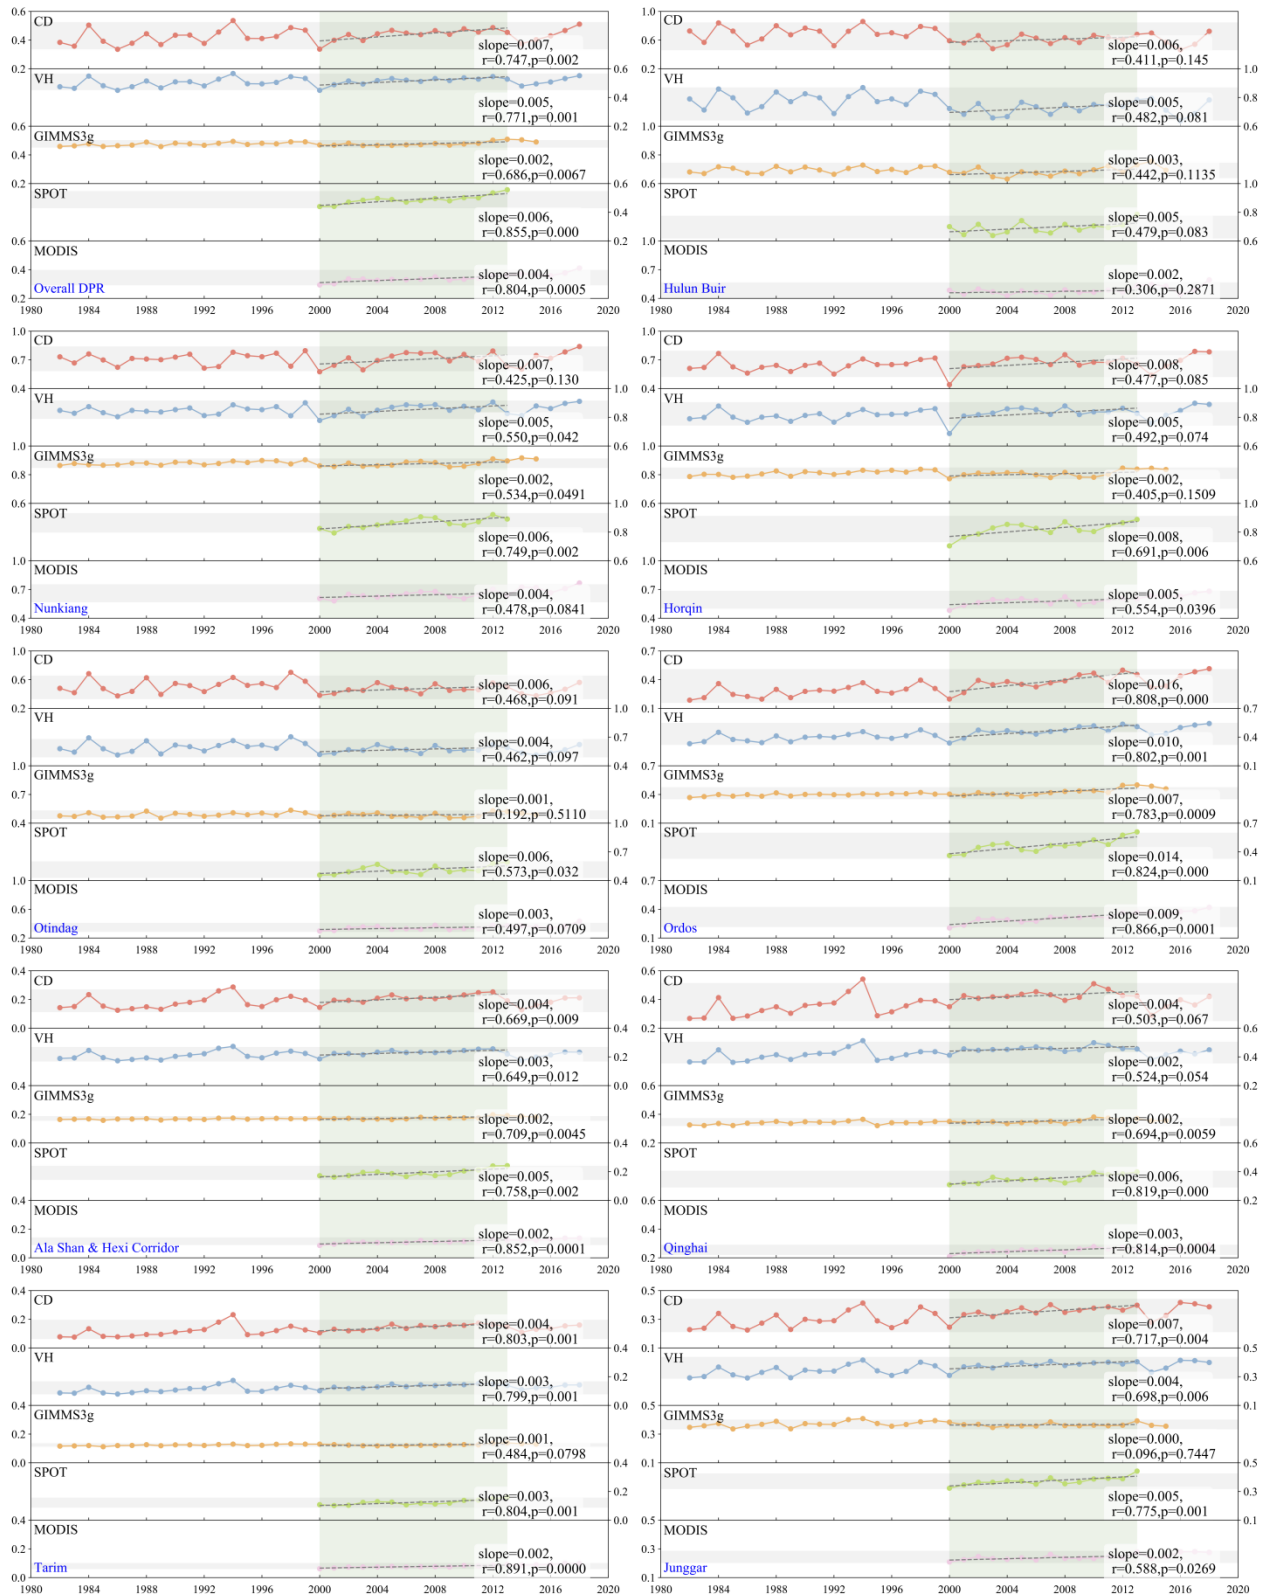

244

245

246

247

248

249

250

251

**Supplementary Fig. 8 Annual variation of the constructed (CD), the Blended Vegetation Health (VH), Global Inventory Modeling and Mapping Studies (GIMMS3g), Satellite Pour l'Observation de la Terre (SPOT), and Moderate-resolution Imaging Spectroradiometer (MODIS) fractional vegetation cover (FVC) in the desertification-prone region and in each subregion.** The locations of subregions are shown in Supplementary Fig. 2. The values are listed as regional averages for each year. The grey shading represents  $FVC \pm 1.96$  standard deviation ( $FVC$  is the multiyear mean), and the green shading represents the 2000-2013 period. All statistical degrees of freedom are 13, and the sample sizes are all 14. The  $r$  value is Pearson's  $R$ . The five different coloured curves, from top to bottom, correspond to the CD, VH, GIMMS3g, SPOT, and MODIS FVC, respectively.

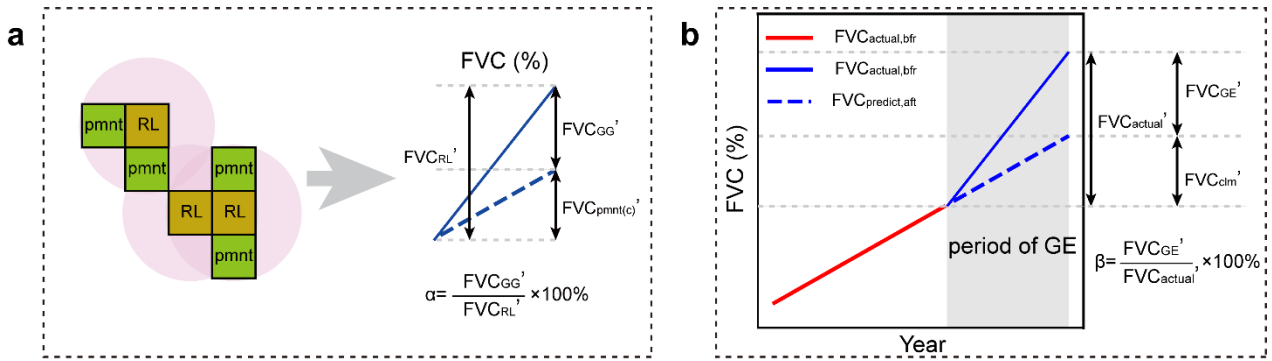

253

254

255

256

257

258

259

260

261

262

**Supplementary Fig. 9 Diagram for estimating the contribution of “grain-for-green” (a) and grazing exclusion (b) practices to vegetation changes.** a: Rehabilitated land (RL) and the adjacent permanent land use types (pmnt(c)) connected via buffers (pink circles), have similar climate, topographic and soil characteristics owing to the short distances among these areas. In the absence of “grain-for-green” practices, RL and pmnt(c) should show similar changes in fractional vegetation cover (FVC). The FVC trends before and after the grazing exclusion (GE) are shown in panel (b). The difference between the predicted FVC ( $FVC_{predict, aft}$ ) driven by unknown factors (residuals) other than climate change and grazing exclusion practices and the actual FVC ( $FVC_{actual, bfr}$ ) thus comes only from the interference of grazing-prohibition activities due to the elimination of the effects of other land-use changes.

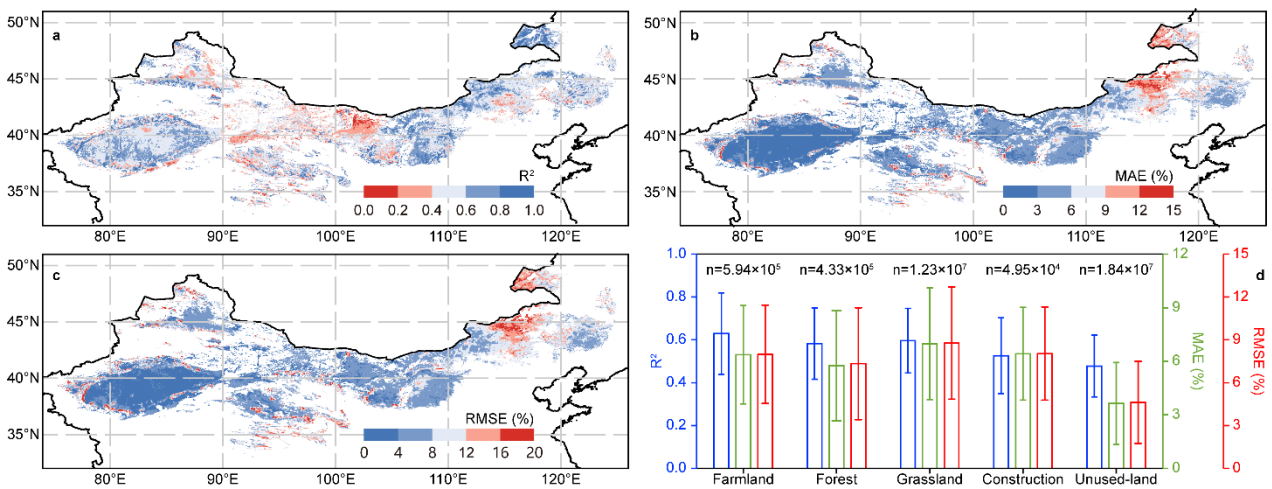

263

264

265

266

267

268

269

270

**Supplementary Fig. 10 Stepwise multiple linear regression model error.** Panels (a-c) show the spatial distribution of the coefficient of determination ( $R^2$ ), the mean absolute error (MAE; %), and the root mean square error (RMSE; %), respectively. The bar chart in panel (d) represent the mean +/- standard deviation of  $R^2$  (marked in blue), MAE (marked in green), and RMSE (marked in red) for each land use type, and statistical pixel sample sizes for farmland, forest, grassland, construction and unused-land are  $5.94 \times 10^5$ ,  $4.33 \times 10^5$ ,  $1.23 \times 10^7$ ,  $4.95 \times 10^4$ , and  $1.81 \times 10^7$ , respectively. See Supplementary Fig. 6 for more details about land use spatial pattern.

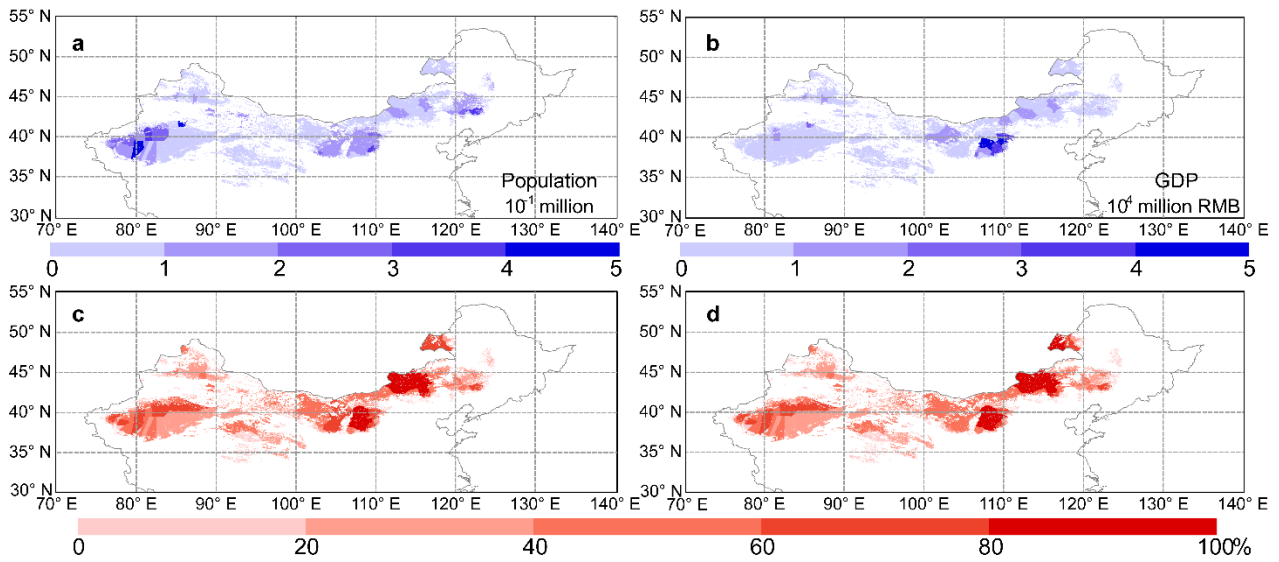

271

272

273

274

Supplementary Fig. 11 County-level population size (a), Gross Domestic Product (GDP, b), and their corresponding proportions (c and d) from 2015 to 2019 in the desertification-prone region of China.

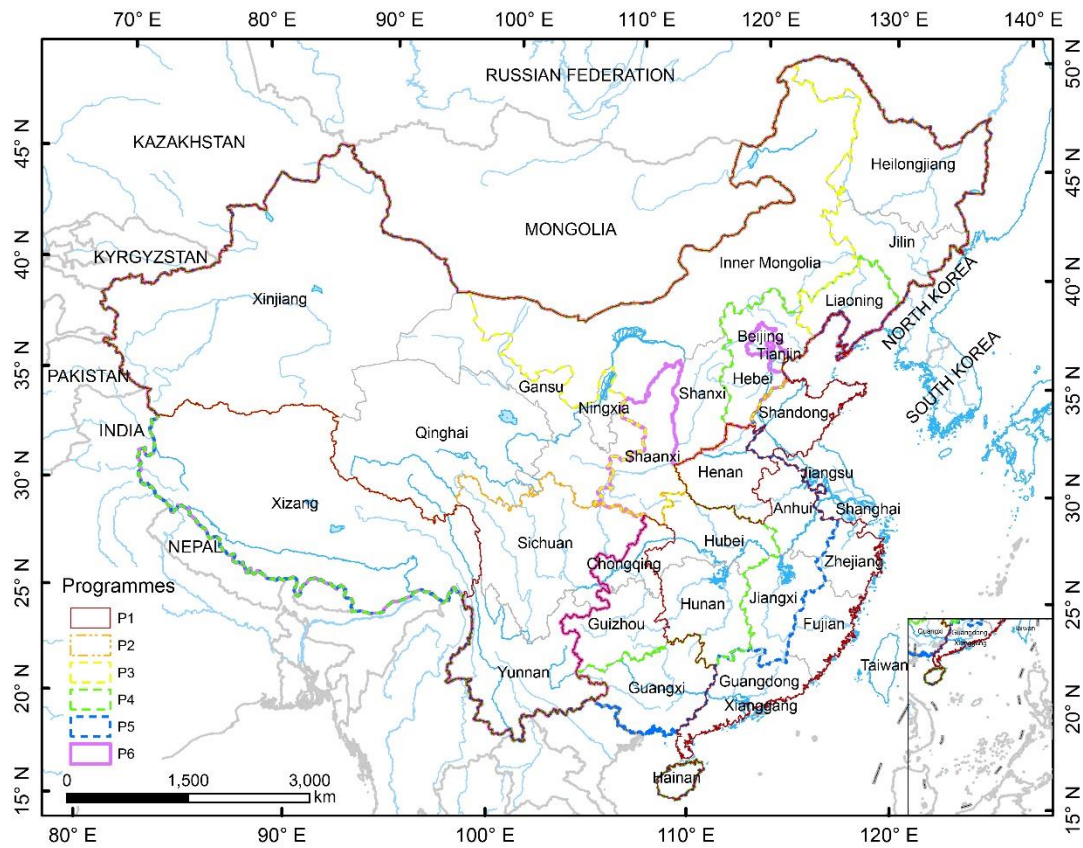

275

276

277

Supplementary Fig. 12 Locations of the provinces of China covered by the programs mentioned in Supplementary Table 11.

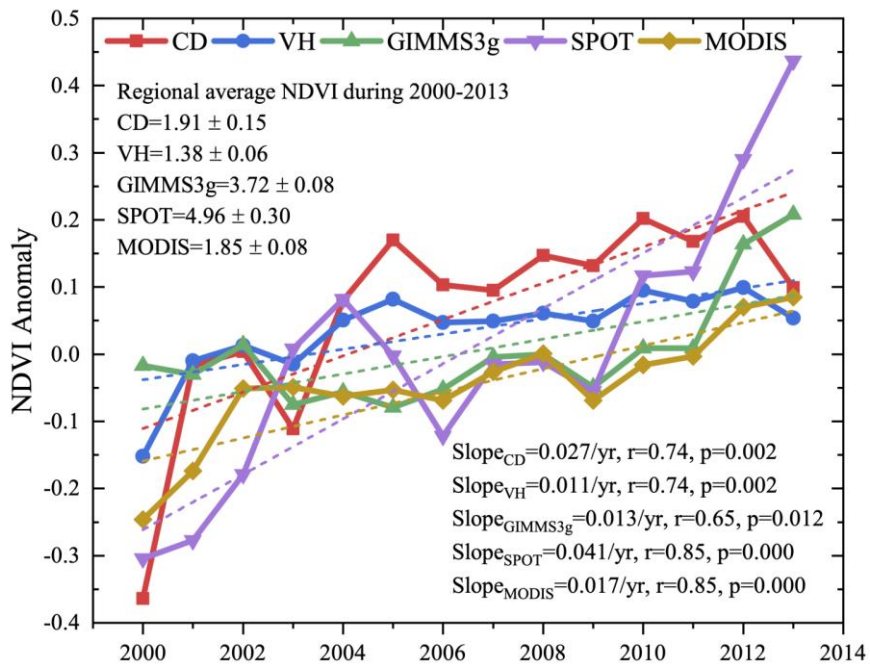

278

279 **Supplementary Fig. 13** Comparison of the annual average the constructed (CD), the Blended Vegetation Health (VH), Global  
280 Inventory Modeling and Mapping Studies (GIMMS3g), Satellite Pour l'Observation de la Terre (SPOT), and Moderate-resolution  
281 Imaging Spectroradiometer (MODIS) normalized difference vegetation index (NDVI) anomalies in the desertification-prone region  
282 in China from 2000-2013. The regional average NDVI is relative to the multiyear mean  $\pm 1$  standard deviation. The slope refers to  
283 the linear change in slope. All statistical degrees of freedom are 13, and the sample sizes are all 14. The r value is Pearson's R.

284

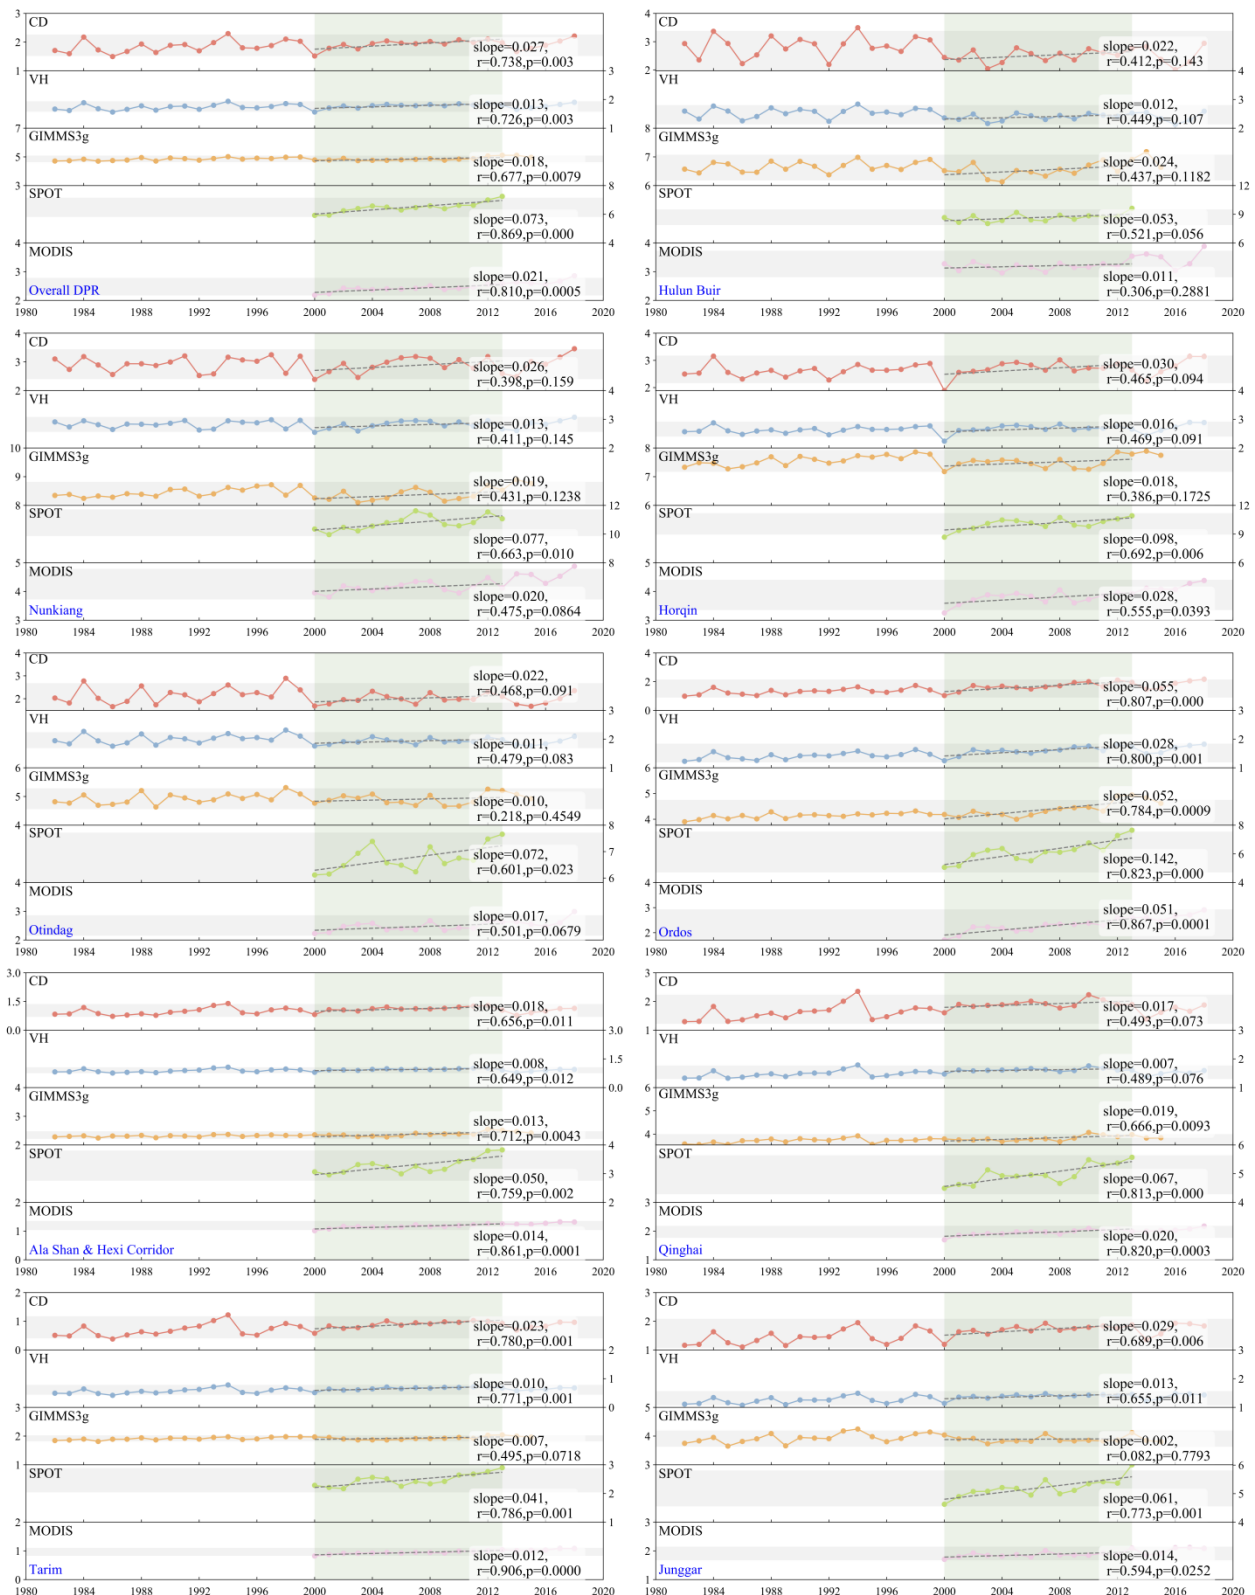

285

286

287

288

289

290

291

292

**Supplementary Fig. 14 Annual variations in the constructed (CD), the Blended Vegetation Health (VH), Global Inventory Modeling and Mapping Studies (GIMMS3g), Satellite Pour l'Observation de la Terre (SPOT), and Moderate-resolution Imaging Spectroradiometer (MODIS) normalized difference vegetation index (NDVI) in the whole desertification-prone region and in each subregion.** The locations of subregions are shown in Supplementary Fig. 2. The NDVI value is the sum of the values obtained for the 12 months in each year. The grey shading indicates  $\text{NDVI} \pm 1.96$  standard deviation (NDVI is the multiyear mean), and the green shading corresponds to the 2000-2013 period. All statistical degrees of freedom are 13, and the sample sizes are all 14. The r value is Pearson's R. The five coloured curves, from top to bottom, correspond to the CD, VH, GIMMS3g, SPOT,





|       |              |              |       |       |        |        |        |          |                       |                          |
|-------|--------------|--------------|-------|-------|--------|--------|--------|----------|-----------------------|--------------------------|
| P2    | 1978-present | GG/GE        | 37.87 | 12.46 | —      | 66.61  | 34.83  | 278.12 ¶ | Ref. <sup>47-50</sup> |                          |
| P3 †† | 2002-present | GG/GE        | 8.01  | 1.73  | 2.53   | 67.64  | 47.68  | 68.71    | Ref. <sup>47,49</sup> |                          |
| P4    | 1998-present | GG/GE        | 6.17  | 2.73  | —      | 235.25 | 218.84 | 235.28   | Ref. <sup>47,49</sup> |                          |
| P5    | 1999-present | GG           | 15.85 | 0.90  | 2.07   | 240.48 | 219.79 | 240.84   | Ref. <sup>47,49</sup> |                          |
| P6    | 1 †‡         | 2002-present | GE    | —     | —      | 78.12  | 29.07  | 29.07    | 29.07                 | Ref. <sup>47,50-52</sup> |
|       | 2            | 2002-present | GE    | —     | —      | 105.16 |        |          |                       |                          |
|       | 3            | 2002-present | GE    | —     | —      | 19.03  |        |          |                       |                          |
|       | 4            | 2011-present | GE    | —     | —      | 170.00 |        |          |                       |                          |
| Total |              | —            | 69.39 | 20.42 | 441.66 | 786.94 | 696.79 | 1001.36  | —                     |                          |

307 **Note:** **A1:** Afforestation; **A2:** mobile sands/hillside anchoring; **A3:** grazing prohibition/fence provision/grass-planting/grassland  
308 improvement.

309 **P1:** National Sand Control Programme, aiming to combat aeolian desertification by mobile sand anchoring, afforestation, grassland  
310 management, water-saving irrigation, and ecological resettlement; **P2:** Great Green Wall Programme, aiming to anchor mobile sands  
311 and to control dust storms by afforestation; **P3:** Beijing-Tianjin Sandstorm Source Control Programme, aiming to control dust storms  
312 occurred in Beijing and Tianjin by afforestation and by returning farmland to grassland; **P4:** Natural Forest Protection Programme,  
313 afforestation and controlling deforestation; **P5:** Returning Farmland to Forests/Grassland Programme; **P6:** National Grassland  
314 Ecological Protection and Construction Programme, aiming to mitigate grassland degradation by grazing exclusion (**P6-1**), grassland  
315 fencing and closure (**P6-2**), grassland management (**P6-3**), and ecological compensation (**P6-4**).

316 † GG and GE represent “grain-for-green” and grazing exclusion practices, respectively, indicating the main countermeasures of  
317 these programme. ‡ Investment amounts were converted to the equivalent amount in 2019 according to the inflation rate calculated  
318 by the consumer price index (CPI; CPI data were obtained from the National Bureau of Statistics of the PRC,  
319 <http://www.stats.gov.cn/>),  $V_t = V_0 * \prod(1 + CPI_i)$ ,  $i=0, 1, \dots, t-1$ , and the unconverted capital investment was ~650 billion RMB (~93  
320 USD). § Statistics for programme P1 were available only for the first phase of the programme. ¶ The total investment was calculated  
321 as the sum of direct capital investments converted from labour hours. The labour hours before 1997 for the Great Green Wall  
322 Programme were obtained from ref.<sup>49</sup>, and the allocation scheme was obtained from ref.<sup>47</sup>. †† Data for the Beijing-Tianjin Sandstorm  
323 Source Control Programme, also including the data before 2001. ‡‡ Grazing exclusion was practised in 2002. After 2011, the new  
324 policies of the Chinese government mainly included ecological compensation practices; among such policies, the compensation for  
325 grazing exclusion was 112.5 RMB/ha and that for grazing limitation was 37.5 RMB/ha<sup>53</sup>.

326

327 **Supplementary Table 2 Planned programmes related to combating desertification in the near future in China.**

| Programme | Period    | Targeted investment (RMB ) | Covered regions | Programme objectives | Data source           |
|-----------|-----------|----------------------------|-----------------|----------------------|-----------------------|
| P1        | 2021-2050 | —                          | 1               | 1                    | Ref. <sup>54</sup>    |
| P2        | 2013-2022 | ~87.8 billion              | 2               | 2                    | Ref. <sup>55</sup>    |
| P3        | 2014-2020 | ~63.6 billion              | 3               | 3                    | Ref. <sup>56</sup>    |
| P4        | 2016-2030 | —                          | 4               | 4                    | Ref. <sup>57,58</sup> |
| P5        | 2016-2025 | —                          | 5               | 5                    | Ref. <sup>57,59</sup> |

|    |   |           |                   |   |   |                    |
|----|---|-----------|-------------------|---|---|--------------------|
| P6 | 1 | 2016-2020 | —                 | 6 | 6 | Ref. <sup>60</sup> |
|    | 2 | 2013-2022 | ~87.8 billion     | 2 |   |                    |
|    | 3 | 2014-2020 | ~63.6 billion     | 3 |   |                    |
|    | 4 | 2016-2020 | 18.7 billion/Year | 7 |   |                    |
| P7 |   | 2014-2020 | Quota             | 8 | 7 | Ref. <sup>52</sup> |

328 **Note:** **P1:** Phase III of the Great Green Wall Programme; **P2:** Phase II of the Beijing-Tianjin Sandstorm Source Control Programme;  
329 **P3:** New round of the Returning Farmland to Forests/Grasslands Programme; **P4:** Sand Control Programme along the ‘Silk Road’;  
330 **P5:** National Desert Park Programme; **P6:** The 13<sup>th</sup> Five-Year Plan for national grassland protection and use; **P6-1:** Pasturing  
331 prohibition; **P6-2:** Phase II of the Beijing-Tianjin Sandstorm Source Control Programme; **P6-3:** New round of the Returning  
332 Farmland to Forests/Grasslands Programme; **P6-4:** Compensation for grassland ecological conservation; **P7:** Aerial seeding  
333 programme for reclaimed grassland in the arable-pastoral zone.

334 **Covered regions:** **1,** Northern China (4.36 million km<sup>2</sup>); **2,** Beijing, Tianjing, Hebei, Inner Mongolia, Shanxi, and Shaanxi Provinces.  
335 **3,** 2.83 million ha in 18 provinces (Western China First); **4,** Nations and regions along the “Silk Road”; **5,** 17 Provinces in northern  
336 China (including 440 counties); **6,** The whole of China; **7,** 13 provinces in northern China; and **8,** 6 provinces in northern China  
337 (including 138 counties).

338 **Programme objectives:** **1,** controlling sand and soil erosion; **2,** combating desertification and controlling dust storms; **3,** returning  
339 farmlands to forests/grasslands; **4,** revegetation; **5,** protecting wildlife resources, restoring desertified lands and promoting  
340 revegetation to achieve sustainable development by establishing national desert parks; **6,** managing grasslands by restoring  
341 vegetation cover, and increasing productivity, and improving herders’ income; and **7,** returning farmlands to grasslands.

343 **Supplementary Table 3 Historical fractional vegetation cover (FVC) trend statistics for different land uses.** slopeMean:  
344 average FVC trend at the pixel scale (% a<sup>-1</sup>); sigSlopeMean: average FVC significant trend (passes the Mann-Kendall test at the 95%  
345 significance level, same below) at the pixel scale (% a<sup>-1</sup>); incArea: area with increasing FVC trends (km<sup>2</sup>); decArea: area with  
346 decreasing FVC trends (km<sup>2</sup>); sigIncArea: area with significantly increasing FVC trends (km<sup>2</sup>); and sigDecArea: area with  
347 significantly decreasing FVC trends (km<sup>2</sup>). Because grazing exclusion has been launched since 2003 in some areas of the  
348 desertification-prone region, the trends over the 2003-2018 period were also examined.

|           | From 1982 to 2018 |              |           |           |            |            |
|-----------|-------------------|--------------|-----------|-----------|------------|------------|
|           | slopeMean         | sigSlopeMean | incArea   | decArea   | sigIncArea | sigDecArea |
| Farmland  | 1.12              | 0.84         | 14960.99  | 3880.27   | 12314.40   | 1652.35    |
| Forest    | 0.46              | 0.29         | 9112.42   | 6648.09   | 6740.11    | 3376.23    |
| Grassland | 0.25              | 0.07         | 207011.30 | 246511.30 | 112688.83  | 83332.76   |
|           | From 2003 to 2018 |              |           |           |            |            |
|           | slopeMean         | sigSlopeMean | incArea   | decArea   | sigIncArea | sigDecArea |
| Farmland  | 1.15              | 2.36         | 14058.62  | 4696.89   | 7508.43    | 722.11     |
| Forest    | 0.34              | 0.97         | 8683.15   | 7030.40   | 3105.28    | 1443.07    |
| Grassland | 0.05              | 0.46         | 199993.63 | 252071.02 | 42667.82   | 42222.46   |

349  
350 **Supplementary Table 4 Expected and actual production (tonnes) of grain and meat without the restrictions on available**  
351 **lands put in place by the “grain-for-green” (GG) and grazing exclusion (GE) practices in the desertification-prone region**

352 **and according to the corresponding reductions (%) in production and income.** In accordance with the times that these two  
 353 practices were extensively launched, grain and meat production losses were estimated since 2001 and 2011, respectively.

| Period | Grain production involving GG |                   |                 | Meat production involving GE |                   |                 | Income cost |
|--------|-------------------------------|-------------------|-----------------|------------------------------|-------------------|-----------------|-------------|
|        | Expected production           | Actual production | Production loss | Expected production          | Actual production | Production loss |             |
| 2001   | 11879640                      | 10163032          |                 | -                            | -                 | -               |             |
| 2002   | 13467509                      | 11521454          |                 | -                            | -                 | -               |             |
| 2003   | 14377161                      | 12299661          | 14.45           | -                            | -                 | -               | 9.14        |
| 2004   | 15201598                      | 13004967          |                 | -                            | -                 | -               |             |
| 2005   | 16505636                      | 14120572          |                 | -                            | -                 | -               |             |
| 2006   | 16218971                      | 14009947          |                 | -                            | -                 | -               |             |
| 2007   | 16687038                      | 14414263          |                 | -                            | -                 | -               |             |
| 2008   | 17769063                      | 15348917          | 13.62           | -                            | -                 | -               | 7.92        |
| 2009   | 17158871                      | 14821833          |                 | -                            | -                 | -               |             |
| 2010   | 18336576                      | 15839134          |                 | -                            | -                 | -               |             |
| 2011   | 18856231                      | 16749990          |                 | 2051191                      | 1539624           |                 |             |
| 2012   | 20274297                      | 18009658          |                 | 2058155                      | 1544851           |                 |             |
| 2013   | 22508206                      | 19994039          | 11.17           | 2127502                      | 1596903           | 24.94           | 17.72       |
| 2014   | 23337900                      | 20731057          |                 | 2223874                      | 1669240           |                 |             |
| 2015   | 24359588                      | 21638622          |                 | 2237978                      | 1679826           |                 |             |
| 2016   | 25128342                      | 21482220          |                 | 2181780                      | 1669062           |                 |             |
| 2017   | 25469389                      | 21773781          |                 | 2119807                      | 1621652           |                 |             |
| 2018   | 26574764                      | 22718766          | 14.51           | 2057455                      | 1573953           | 23.5            | 18.77       |
| 2019   | 27645832                      | 23634422          |                 | 2123305                      | 1624328           |                 |             |
| 2020   | 28017946                      | 23952542          |                 | 2133431                      | 1632075           |                 |             |

354  
 355 **Supplementary Table 5 Population, the gross domestic product (GDP), and the income of arable-land farmers and livestock**  
 356 **herders in the desertification-prone region.** The conversion coefficient is based on the consumer price index (CPI)  
 357 (<http://tongji.cnki.net/kns55/Navi/NaviDefault.aspx>), and GDP and incomes are converted to 2020 equivalent amounts. SD is the  
 358 standard deviation.

| Year                                                                           | 2015     | 2016     | 2017     | 2018     | 2019     | 2015~2019 Mean | 2015~2019 SD |
|--------------------------------------------------------------------------------|----------|----------|----------|----------|----------|----------------|--------------|
| * Conversion coefficient                                                       | 1.12     | 1.09     | 1.08     | 1.05     | 1.03     | -              | -            |
| Population ( $\times 10^4$ )                                                   | 1529.25  | 1532.75  | 1530.13  | 1537.14  | 1537.58  | 1533.37        | 3.87         |
| GDP ( $\times 10^8$ RMB)                                                       | 10682.24 | 10546.85 | 10474.37 | 11105.78 | 11783.23 | 10918.49       | 541.76       |
| Disposable income of arable farmers and livestock herders ( $\times 10^8$ RMB) | 1810.336 | 1902.752 | 2052.064 | 2199.929 | 2334.124 | 2059.84        | 213.22       |
| Income from arable agriculture and animal husbandry ( $\times 10^8$ RMB)       | 954.40   | 899.96   | 923.44   | 978.38   | 920.20   | 935.28         | 30.98        |

359  
 360 **Supplementary Table 6 Direct payments from the Chinese authorities to arable farmers and livestock herders related to**

361 **“grain-for-green” and grazing exclusion practices.** The total sum from 1999 to 2004 was 100 RMB  $\approx$  14 USD. The yearly average  
362 payments of the two practices in the most recent 5 years (2014-2018) were  $\sim$ 6.82 billion RMB and 17.86 billion RMB at the  
363 provincial scale, respectively. According to the area ratio of the “grain-for-green” (9.72%) and grazing exclusion (28.23%) practices  
364 located in the desertification-prone region (DPR), the yearly average payments of these two practices reached  $\sim$ 0.66 billion RMB  
365 and  $\sim$ 5.04 billion RMB, respectively, and the yearly total payment was  $\sim$ 5.70 billion RMB ( $\sim$ 0.80 billion USD). The areas of returned  
366 farmland for “grain-for-green” practices in the DPR and at the provincial scale (11 provinces) were 5634.5 km<sup>2</sup> and 57,981.36 km<sup>2</sup>,  
367 respectively, based on statistics from land-use changes from 2000 to 2020. The areas of grasslands involved in grazing exclusion  
368 practices in the DPR and nationwide were 48 million km<sup>2</sup> and  $\sim$ 170 million km<sup>2</sup>, respectively. These data were obtained from the  
369 Editorial Department of China Environmental Yearbook (2003-2018) and China Forestry Statistical Yearbook (1998-2017).

| Year           | Grain-for-green (100 million RMB) |               |                | Grassland ecological compensation (100 million RMB) |
|----------------|-----------------------------------|---------------|----------------|-----------------------------------------------------|
|                | Living subsidy                    | Grain subsidy | Direct payment |                                                     |
| *1999~2004     | 61.61                             | 77.41         | 139.02         | /                                                   |
| 2005           | 14.37                             | 104.38        | 118.75         | /                                                   |
| 2006           | 14.59                             | 100.40        | 114.99         | /                                                   |
| 2007           | 15.33                             | 109.05        | 124.38         | /                                                   |
| 2008           | 15.42                             | 107.52        | 122.94         | /                                                   |
| 2009           | 15.83                             | 102.60        | 118.42         | /                                                   |
| 2010           | 22.60                             | 80.27         | 102.87         | /                                                   |
| 2011           | 19.98                             | 60.67         | 80.64          | 136.00                                              |
| 2012           | 20.10                             | 47.65         | 67.75          | 150.00                                              |
| 2013           | 22.35                             | 30.63         | 52.97          | 159.46                                              |
| 2014           | 54.71                             | 2.22          | 56.93          | 160.69                                              |
| 2015           | 52.48                             | 14.81         | 67.29          | 169.49                                              |
| 2016           | 51.16                             | 19.36         | 70.52          | 187.60                                              |
| 2017           | 47.85                             | 23.09         | 70.93          | 187.60                                              |
| 2018           | 35.64                             | 39.41         | 75.05          | 187.60                                              |
| 2014~2018 ave. | 48.37                             | 19.78         | 68.15          | 178.60                                              |

370  
371 **Supplementary Table 7 Future fractional vegetation cover (FVC) trend statistics for different land uses under different**  
372 **shared socioeconomic pathway (SSP) and representative concentration pathway (RCP) scenarios.** The meaning and units of  
373 the indicator are the same as those described in Supplementary Table 3.

|           | From 2015 to 2050 in SSP1-2.6 |              |           |           |            |            |
|-----------|-------------------------------|--------------|-----------|-----------|------------|------------|
|           | slopeMean                     | sigSlopeMean | incArea   | decArea   | sigIncArea | sigDecArea |
| Farmland  | 1.06                          | 1.09         | 13726.38  | 2454.46   | 13496.16   | 2243.67    |
| Forest    | 0.39                          | 0.40         | 9824.90   | 5772.79   | 9502.21    | 5434.39    |
| Grassland | 0.08                          | 0.09         | 204815.91 | 251512.83 | 190275.40  | 234110.80  |
|           | From 2015 to 2050 in SSP2-4.5 |              |           |           |            |            |
|           | slopeMean                     | sigSlopeMean | incArea   | decArea   | sigIncArea | sigDecArea |
| Farmland  | 1.56                          | 1.60         | 13235.03  | 2945.81   | 13052.54   | 2799.67    |
| Forest    | 0.54                          | 0.56         | 9525.79   | 6071.89   | 9293.40    | 5892.86    |

| Grassland                     | 0.04      | 0.04         | 188264.83 | 268063.90 | 180342.08  | 258837.80  |
|-------------------------------|-----------|--------------|-----------|-----------|------------|------------|
| From 2015 to 2050 in SSP5-8.5 |           |              |           |           |            |            |
|                               | slopeMean | sigSlopeMean | incArea   | decArea   | sigIncArea | sigDecArea |
| Farmland                      | 2.37      | 2.41         | 13085.63  | 3095.22   | 12972.37   | 2955.39    |
| Forest                        | 0.82      | 0.83         | 9470.05   | 6127.63   | 9330.73    | 5985.60    |
| Grassland                     | 0.03      | 0.03         | 185108.28 | 271220.45 | 180149.71  | 265774.80  |

374

375

376

377

378

**Supplementary Table 8 Comparison of the averaged of the constructed (CD), the Blended Vegetation Health (VH), Global Inventory Modeling and Mapping Studies (GIMMS3g), Satellite Pour l'Observation de la Terre (SPOT), and Moderate-resolution Imaging Spectroradiometer (MODIS) fractional vegetation cover values in different regions in the desertification-prone region from 2000-2013.** The locations of these regions are shown in Supplementary Fig. 2.

| Region                   | CD    | VH    | GIMMS3g | SPOT  | MODIS | Mean  | SD (Standard Deviation) |
|--------------------------|-------|-------|---------|-------|-------|-------|-------------------------|
| Hulun Buir               | 0.606 | 0.725 | 0.681   | 0.694 | 0.471 | 0.635 | 0.102                   |
| Nunkiang                 | 0.703 | 0.853 | 0.875   | 0.863 | 0.64  | 0.787 | 0.108                   |
| Horqin                   | 0.664 | 0.829 | 0.805   | 0.821 | 0.574 | 0.739 | 0.114                   |
| Otindag                  | 0.471 | 0.571 | 0.486   | 0.514 | 0.338 | 0.476 | 0.086                   |
| Ordos                    | 0.376 | 0.461 | 0.425   | 0.469 | 0.299 | 0.406 | 0.070                   |
| Ala Shan & Hexi Corridor | 0.208 | 0.231 | 0.174   | 0.193 | 0.110 | 0.183 | 0.046                   |
| Qinghai                  | 0.428 | 0.456 | 0.353   | 0.35  | 0.251 | 0.368 | 0.080                   |
| Tarim                    | 0.145 | 0.135 | 0.125   | 0.124 | 0.076 | 0.121 | 0.027                   |
| Junggar                  | 0.354 | 0.381 | 0.365   | 0.373 | 0.238 | 0.342 | 0.059                   |
| Over DPR                 | 0.439 | 0.516 | 0.476   | 0.489 | 0.333 | 0.451 | 0.071                   |

379

380

381

382

383

384

385

**Supplementary Table 9 Pearson's correlation coefficients between the constructed (CD), the Blended Vegetation Health (VH), Global Inventory Modeling and Mapping Studies (GIMMS3g), Satellite Pour l'Observation de la Terre (SPOT), and Moderate-resolution Imaging Spectroradiometer (MODIS) fractional vegetation cover in different regions in the desertification-prone region from 2000-2013.** The locations of these regions are shown in Supplementary Fig. 2. The '\*' symbol indicates that the correlation coefficient is significant at the 95% confidence level; the '\*\*' symbol indicates that the correlation coefficient is significant at the 99% confidence level.

| Region                   | VH     | GIMMS3g | SPOT   | MODIS  |
|--------------------------|--------|---------|--------|--------|
| Hulun Buir               | 0.97** | 0.81**  | 0.84** | 0.64*  |
| Nunkiang                 | 0.98** | 0.52    | 0.66** | 0.64*  |
| Horqin                   | 1.00** | 0.56*   | 0.85** | 0.89** |
| Otindag                  | 1.00** | 0.69**  | 0.86** | 0.85** |
| Ordos                    | 1.00** | 0.74**  | 0.88** | 0.93** |
| Ala Shan & Hexi Corridor | 0.99** | 0.31    | 0.45   | 0.67** |
| Qinghai                  | 1.00** | 0.60*   | 0.68** | 0.81** |
| Tarim                    | 0.99** | 0.13    | 0.57*  | 0.69** |
| Junggar                  | 1.00** | 0.05    | 0.81** | 0.78** |

**Supplementary Table 10 Commonly used global climate models (GCMs) in the Coupled Model Intercomparison Project Phase 6 (CMIP6) model experiments<sup>61</sup>.**

| No. | GCM             | Grid (lon × lat) | Organization                   |
|-----|-----------------|------------------|--------------------------------|
| 1   | ACCESS-ESM1-5   | 192×145          | CSIRO, Australia               |
| 2   | CanESM5         | 128×64           | CCCma, Canada                  |
| 3   | CanESM5-CanOE   | 128×64           | CCCma, Canada                  |
| 4   | CAS-ESM2-0      | 256×128          | CAS, China                     |
| 5   | CMCC-CM2-SR5    | 288×192          | CMCC, Italy                    |
| 6   | CMCC-ESM2       | 288×192          | CMCC, Italy                    |
| 7   | CNRM-CM6-1      | 256×128          | CNRM-CERFACS, France           |
| 8   | CNRM-ESM2-1     | 256×128          | CNRM-CERFACS, France           |
| 9   | EC-Earth3-Veg   | 512×256          | EC-Earth-Consortium            |
| 10  | FGOALS-g3       | 180×80           | CAS, China                     |
| 11  | FIO-ESM-2-0     | 288×192          | FIO-QLNM, China                |
| 12  | GFDL-ESM4       | 288×180          | NOAA-GFDL, US                  |
| 13  | GISS-E2-1-G     | 144×90           | NASA-GISS, US                  |
| 14  | HadGEM3-GC31-LL | 192×144          | MOHC, NERC, UK                 |
| 15  | INM-CM4-8       | 180×120          | INM, Russia                    |
| 16  | INM-CM5-0       | 180×120          | INM, Russia                    |
| 17  | IPSL-CM6A-LR    | 144×143          | IPSL, France                   |
| 18  | MIROC-ES2L      | 128×64           | MIROC, Japan                   |
| 19  | MPI-ESM1-2-HR   | 384×192          | MPI-M, DWD, DKRZ, Germany      |
| 20  | MPI-ESM1-2-LR   | 192×96           | MPI-M, AWI, DKRZ, DWD, Germany |
| 21  | UKESM1-0-LL     | 192×144          | MOHC, NERC, NIMS-KMA, NIWA     |

**Supplementary Table 11 Detailed countermeasures of ecological programmes in China.**

| Programme | Provinces included                                                                              | Countermeasure                                                                                                                                                                                                                                                                                                      | Land use type                                           | References            |
|-----------|-------------------------------------------------------------------------------------------------|---------------------------------------------------------------------------------------------------------------------------------------------------------------------------------------------------------------------------------------------------------------------------------------------------------------------|---------------------------------------------------------|-----------------------|
| <b>P1</b> | BJ, TJ, HE, SX, NM, LN, JL, HLJ, ZJ, AH, FJ, JX, SD, HN, HB, GD, HI, SC, YN, SN, GS, NX, QH, XJ | (1) Afforestation, (2) Closing hillsides to facilitate afforestation and sandy land protection, (3) Artificial grass planting in grassland, (4) Aeolian desertified land (grassland and farmland included) controlling, (5) Mobile sand anchoring, (6) Water-saving irrigation, and (7) Ecological resettlement     | Forest, grassland, and farmland                         | Ref. <sup>62</sup>    |
| <b>P2</b> | BJ, TJ, HE, SX, NM, LN, JL, HLJ, SN, GS, NX, QH, XJ                                             | (1) Afforestation, (2) Closing hillsides to facilitate afforestation and sandy land protection, (3) Tree planting along the sides of roads, ditches, canals, and houses, (4) Forest network building for farmlands, oases, and pasture, and (5) Grass / tree planting on surfaces of mobile and semi-anchored dunes | Forest, grassland, farmland, and unused land            | Ref. <sup>63,64</sup> |
| <b>P3</b> | BJ, TJ, HB, SX, NM, SN                                                                          | (1) Grain for green, (2) Afforestation, (3) Grassland construction, (4) Water controlling, and (5) Ecological resettlement                                                                                                                                                                                          | Forest, grassland, desertified farmland, and sandy land | Ref. <sup>64,65</sup> |
| <b>P4</b> | NM, HLJ, JL, HI, CQ, SC, GZ, YN,                                                                | (1) Deforestation forbidding in the upper and middle reaches of Yellow River and in the upper reaches of Yangtze River,                                                                                                                                                                                             | Forest                                                  | Ref. <sup>64,66</sup> |





399

400 **Supplementary Table 13 Fitting and cross-validation results obtained for cultivated lands and grasslands in 18 counties in**401 **different areas of the desertification-prone region in 1995, 2005, and 2015.** R<sup>2</sup> indicates the goodness of fit, and ‘\*\*’ indicates

402 that the results are significant at the 99% confidence level. The cross-validation results show the error percentage between the

403 observed and the predicted values in the corresponding year. The geographical locations of the counties listed in the table are shown

404 in Supplementary Fig. 6. The region codes are established as follows: A1: Hulunbuir, A2: Nenjiang, A3: Horqin, A4: Hunshandak,

405 A5: Ordos, A6: Alashan and Hexi Corridor, A7: Qinghai, A8: Tarim, and A9: Junggar.

| Zone | County         | Cropland area |                |                              |        |        | Grassland area |                |                              |       |        |
|------|----------------|---------------|----------------|------------------------------|--------|--------|----------------|----------------|------------------------------|-------|--------|
|      |                | Significance  | R <sup>2</sup> | Cross-validation results (%) |        |        | Significance   | R <sup>2</sup> | Cross-validation results (%) |       |        |
|      |                |               |                | 1995                         | 2005   | 2015   |                |                | 1995                         | 2005  | 2015   |
| A1   | Xin Barag      | **            | 0.96           | 4.42                         | 25.98  | -4.20  | **             | 0.97           | -0.05                        | -0.20 | 0.23   |
|      | Youqi          |               |                |                              |        |        |                |                |                              |       |        |
|      | Chen Barag     | **            | 0.86           | 0.00                         | 0.00   | 0.00   | **             | 0.92           | 0.00                         | 0.00  | 0.00   |
| A2   | Gannan         | **            | 0.97           | -6.33                        | -6.49  | 7.85   | **             | 0.81           | -2.39                        | 0.37  | 2.67   |
|      | Tailai         | **            | 0.96           | -7.58                        | -0.32  | -6.85  | **             | 0.93           | -6.04                        | -0.02 | 1.44   |
| A3   | Tongyu         | **            | 0.93           | -13.63                       | -3.30  | 10.37  | **             | 0.92           | 35.91                        | 6.60  | -26.40 |
|      | Naiman         | **            | 0.54           | 20.48                        | -7.18  | -6.37  | **             | 0.95           | 0.26                         | -1.06 | 0.39   |
| A4   | Abaga Qi       | **            | 0.93           | 15.98                        | -34.90 | 3.46   | **             | 0.92           | -0.22                        | 0.30  | -0.06  |
|      | Sunite Youqi   | **            | 0.82           | 30.96                        | -30.62 | 52.27  | **             | 0.42           | 0.00                         | 0.26  | 0.11   |
| A5   | Hangjin Qi     | **            | 0.94           | 12.58                        | -11.42 | -4.72  | **             | 0.47           | -0.18                        | 2.05  | -1.66  |
|      | Uxin Qi        | **            | 0.90           | -4.58                        | -24.11 | -14.43 | **             | 0.93           | -4.20                        | 6.51  | -0.46  |
| A6   | Ala Shan Zuoqi | **            | 0.93           | -0.65                        | 2.12   | -6.15  | **             | 0.94           | 3.51                         | 3.70  | -8.24  |
|      | Ejin Qi        | **            | 0.84           | 0.68                         | -1.36  | -0.89  | **             | 0.55           | 0.10                         | 1.02  | -2.84  |
| A7   | Dulan          | **            | 0.80           | 10.15                        | 0.35   | -3.93  | **             | 0.84           | -0.09                        | -0.46 | 0.60   |
|      | Guinan         | **            | 0.94           | 5.74                         | 24.42  | -7.88  | **             | 0.97           | -0.29                        | -0.42 | 0.16   |
| A8   | Yuli           | **            | 0.98           | 8.84                         | 4.85   | 3.86   | **             | 0.96           | 9.20                         | 2.54  | -6.43  |
|      | Qira           | **            | 0.95           | 11.58                        | 36.72  | -6.00  | **             | 0.74           | -5.39                        | 0.07  | 5.36   |
| A9   | Fuhai          | **            | 0.97           | 14.62                        | -10.91 | -11.04 | **             | 0.86           | -3.24                        | -0.07 | 8.42   |
|      | Hutubi         | **            | 0.96           | 14.76                        | 11.20  | -9.78  | **             | 0.88           | -2.29                        | -2.45 | 12.18  |

406

407 **References:**408 1. UN Secretariat of the Conference on Desertification (UNCD). *Desertification: An overview, In: Desertification: Its Causes*409 *and Consequences.* (Pergamon Press, 1977).410 2. United Nations. *Results of the World Conference on Environment and Development: Agenda 21. UNCED United Nations*

- 411 *Conference on Environment and Development. Rio de Janeiro. (1992).*
- 412 3. The Central Government of the People's Republic of China. *The Third Communiqué on Desertification and Desertification in*
- 413 *China.* [http://www.gov.cn/ztlz/fszs/content\\_650487.htm](http://www.gov.cn/ztlz/fszs/content_650487.htm) (2007).
- 414 4. State Forestry Administration of China (SFAC). *The Bulletin of Status Quo of Desertification and Sandification in China.*
- 415 <http://www.forestry.gov.cn/> (2000, 2005, 2010, 2015).
- 416 5. Zhang, K., Xie, Y. & Wei, X. *Evaluation of Soil Erosion on the Loess Plateau.* (Science Press, 2015).
- 417 6. Cheng, G. *et al.* Characteristic, changes and impacts of permafrost on Qinghai-Tibet Plateau. *Chinese Sci. Bull.* **64**, 2783–2795
- 418 (2019).
- 419 7. Chang, Q. & Xie, B. *Vegetation of Dynamics and Climate Change of the Loess Plateau.* (Science Press, 2019).
- 420 8. Zhang, T., Huang, Y. & Yang, X. Climate warming over the past three decades has shortened rice growth duration in China
- 421 and cultivar shifts have further accelerated the process for late rice. *Global Change Biol.* **19**, 563–570 (2013).
- 422 9. Zhou, H., Chen, Y. & Li, W. Effect of oasis hydrological processes on soil salinization of Tikanlik Oasis in the lower Tarim
- 423 River. *Acta Geographica Sinica* **63**, 714–724 (2008).
- 424 10. Currell, M., Han, D., Chen, Z. & Cartwright, I. Sustainability of groundwater usage in northern China: dependence on
- 425 palaeowaters and effects on water quality, quantity and ecosystem health. *Hydrol. Process.* **26**, 4050–4066 (2012).
- 426 11. Wang, T. *et al.* Contrasting groundwater depletion patterns induced by anthropogenic and climate-driven factors on Alxa
- 427 Plateau, northwestern China. *J. Hydrol.* **576**, 262–272 (2019).
- 428 12. Xia, J. *et al.* Evaluating the dynamics of groundwater depletion for an arid land in the Tarim Basin, China. *Water* **11**, 186
- 429 (2019).
- 430 13. Zhu, Z. Current Situation and Prospec of Land Desertification Problem. *Geogr. Res.* **13**, 105–113 (1994).
- 431 14. Zhu, Z. Concept, Cause and Control of Desertification in China. *Quaternary Sciences* **18**, 145–155 (1998).
- 432 15. Zhu, Z. & Chen, G. *Sandy Desertification in China.* (Science Press, 1994).
- 433 16. Reynolds, J. *et al.* Global Desertification: Building a Science for Dryland Development. *Science* **316**, 847–851 (2007).
- 434 17. Ci, L. & Yang, X. *Desertification and its control in China.* (Higher Education Press, 2010).
- 435 18. Cooke, R. U. Stone pavement in deserts. *Annals of the Association of American Geographers* **60**, 560–577 (1970).
- 436 19. Chen, X. *Physical Geography of Arid land in China.* (Science Press, 2000).
- 437 20. Zhu, Z. & Liu, S. *Desert Evolutions in Historical Periods of China. Physical Geography in China (Vol. Historical Geography).*
- 438 (Science Press, 1982).
- 439 21. Yin, P., Fang, X., Tian, Q. & Ma, Y. Distribution and regional difference of main output regions in grain production in China
- 440 in the early 21st century. *Acta Geographica Sinica* **61**, 190–198 (2006).
- 441 22. Sun, Z., Du, Q., Han, C. & Min, Z. *General Agricultural History of China-The Ming and Qing Dynasties.* (China Agriculture
- 442 Press, 2016).
- 443 23. Li, J., Li, B., Hu, P. & Tian, Y. *Economic History of Sheep in China.* (China Agricultural Science and Technology Press, 2015).
- 444 24. Wang, X. Sandy desertification: Borne on the wind. *Chinese Sci. Bull.* **58**, 2395–2403 (2013).
- 445 25. Zhou, Z., Zhu, Z. & Liu, Z. *Restoration of Degraded Arid Desert Ecosystems and Sustainable Development.* (Science Press,
- 446 2010).
- 447 26. Bao, G., Qin, Z., Bao, Y. & Zhou, Y. Spatial-temporal changes of vegetation cover in Mongolian plateau during 1982–2006.
- 448 *Journal of Desert Research* **33**, 918–927 (2013).
- 449 27. Lu, H. *et al.* Formation and evolution of Gobi Desert in central and eastern Asia. *Earth-Sci. Rev.* **194**, 251–263 (2019).
- 450 28. Hird, J. & McDermid, G. Noise reduction of NDVI time series: An empirical comparison of selected techniques. *Remote Sens.*
- 451 *Environ.* **113**, 248–258 (2009).
- 452 29. Ma, M. & Veroustraete, F. Reconstructing pathfinder AVHRR land NDVI time-series data for the Northwest of China. *Adv.*
- 453 *Space Res.* **37**, 835–840 (2006).
- 454 30. Fensholt, R., Rasmussen, K., Nielsen, T. & Mbow, C. Evaluation of earth observation based long term vegetation trends -
- 455 Intercomparing NDVI time series trend analysis consistency of Sahel from AVHRR GIMMS, Terra MODIS and SPOT VGT
- 456 data. *Remote Sens. Environ.* **113**, 1886–1898 (2009).
- 457 31. Tian, F. *et al.* Evaluating temporal consistency of long-term global NDVI datasets for trend analysis. *Remote Sens. Environ.*
- 458 **163**, 326–340 (2015).

- 459 32. Meinshausen, M. *et al.* The shared socio-economic pathway (SSP) greenhouse gas concentrations and their extensions to 2500.  
460 *Geoscientific Model Development* **13**, 3571–3605 (2020).
- 461 33. O'Neill, B.C. *et al.* The Scenario Model Intercomparison Project (ScenarioMIP) for CMIP6. *Geoscientific Model Development*  
462 **9**, 3461–3482 (2016).
- 463 34. Lalande, M., Ménégoz, M., Krinner, G., Naegeli, K. & Wunderle, S. Climate change in the High Mountain Asia in CMIP6.  
464 *Earth System Dynamics* **12**, 1061–1098 (2021).
- 465 35. Donohue, R.J., Roderick, M.L., McVicar, T.R. & Farquhar, G.D. Impact of CO<sub>2</sub> fertilization on maximum foliage cover across  
466 the globe's warm, arid environments. *Geophysical Research Letters* **40**, 3031–3035 (2013).
- 467 36. Piao, S. *et al.* Detection and attribution of vegetation greening trend in China over the last 30 years. *Global Change Biology*  
468 **21**, 1601–1609 (2015).
- 469 37. Meinshausen, M. *et al.* Historical greenhouse gas concentrations for climate modelling (CMIP6). *Geoscientific Model*  
470 *Development* **10**, 2057–2116 (2017).
- 471 38. Teutschbein, C. & Seibert, J. Bias correction of regional climate model simulations for hydrological climate-change impact  
472 studies: Review and evaluation of different methods. *Journal of Hydrology* **456–457**, 12–29 (2012).
- 473 39. Xu, X. *et al.* Remote Sensing Monitoring Data of Land Use in China. (Data Registration and Publishing System of the Resource  
474 and Environmental Science Data Center of the Chinese Academy of Sciences, 2018).  
475 <https://www.resdc.cn/data.aspx?DATAID=335>
- 476 40. Liu, J. *et al.* Spatio-temporal characteristics, patterns and causes of land-use changes in China since the late 1980s. *J. Geogr.*  
477 *Sci.* **24**, 195–210 (2014).
- 478 41. Liu, J. *et al.* Spatio-temporal patterns and characteristics of land-use change in China during 2010-2015. *J. Geogr. Sci.* **73**,  
479 789–802 (2018).
- 480 42. Li, J., Li, Z., Wu, H. & You, N. Trend, seasonality, and abrupt change detection method for land surface temperature time-  
481 series analysis: Evaluation and improvement. *Remote Sens. of Environ.* **280**, 113222 (2022).
- 482 43. Li, Y., L, Y., Westlund, H. & Liu, Y. Urban–rural transformation in relation to cultivated land conversion in China: Implications  
483 for optimizing land use and balanced regional development. *Land Use Policy* **47**, 218–224 (2015).
- 484 44. Hocking, R. R. Developments in Linear Regression Methodology: 1959-1982. *Technometrics* (1983).
- 485 45. Zhang, G., Zhang, Y., Dong, J. & Xiao, X. Green-up dates in the Tibetan Plateau have continuously advanced from 1982 to  
486 2011. *Proc. Natl. Acad. Sci. USA* **110**, 4309–4314 (2013).
- 487 46. State Forestry Administration of the PRC (SFA). *China Forestry Statistical Yearbook 1998-2017*. (China Forestry Publishing  
488 House, 1998-2017).
- 489 47. Kang, R. The largest ecological project in China-Three North Shelterbelt System. *Environmental Protection* **3**, 6–8 (1988).
- 490 48. National Forestry and Grassland Administration of the PRC (NFGA). *China Forestry and Grassland Statistical Yearbook 2018*.  
491 (China Forestry Publishing House, 2018).
- 492 49. Sun, C. Historical review and perspective of investment and task in the construction of the three North Shelterbelt System.  
493 *Protection Forest Science and Technology* **91**, 59–61 (2009).
- 494 50. Bureau of Agriculture and Animal Husbandry of the PRC (BAAH). National plan for grassland ecological protection and  
495 construction from 2001 to 2010. *Pratacultural Science* **20**, 68–69, 80–84 (2003).
- 496 51. China News. *Suggestions on improving the policy of returning grazing land to grassland issued by the three ministries*.  
497 <http://www.chinanews.com/cj/2011/08-31/3297565.shtml> (2011).
- 498 52. National Development and Reform Commission of the PRC (NDRC). *Work plan for the construction of the pilot project of*  
499 *cultivated grassland management in agro-pastoral ecotone in 2016*. (2016).
- 500 53. Geng, G. Grassland ecological protection has a long way to go. *Green China* **15**, 30–33 (2018).
- 501 54. Zhu, J. & Zheng, X. The prospects of development of the Three-North Afforestation Program (TNAP): On the basis of the  
502 results of the 40-year construction general assessment of the TNAP. *Chinese Journal of Ecology* **38**, 1600–1610 (2019).
- 503 55. Central Government Website of the PRC. *Total investment of the second phase of the Beijing-Tianjin Sandstorm Source Control*  
504 *Project will reach 87.792 billion yuan*. [http://www.gov.cn/jrzq/2012-10/07/content\\_2238556.htm](http://www.gov.cn/jrzq/2012-10/07/content_2238556.htm) (2012).
- 505 56. State Forestry Administration of the PRC (SFA). *The State Council approved the implementation of the general plan for a new*  
506 *round of the Grain for Green*. <http://www.forestry.gov.cn/main/4093/content-730197.html> (2015).

- 507 57. Bao, Y. *et al.* Review of 60 years combating desertification in China and prospects on it. *Science of Soil and Water Conservation*  
508 **16**, 144–150 (2018).
- 509 58. China Green Times. *Belt and Road Initiative to combat desertification*. [http://www.forestry.gov.cn/main/72/content-](http://www.forestry.gov.cn/main/72/content-881674.html)  
510 881674.html (2016).
- 511 59. State Forestry Administration of the PRC (SFA). *China Forestry Yearbook 2016*. (China Forestry Publishing House, 2016).
- 512 60. Ministry of Agriculture of the PRC. *Circular of the Ministry of Agriculture on printing and distributing the 13th five-year plan*  
513 *for national grassland protection, construction, and utilization*.  
514 [http://www.moa.gov.cn/nybggb/2017/dyiq/201712/t20171227\\_6129885.htm](http://www.moa.gov.cn/nybggb/2017/dyiq/201712/t20171227_6129885.htm) (2017).
- 515 61. Eyring, V. *et al.* Overview of the Coupled Model Intercomparison Project Phase 6 (CMIP6) experimental design and  
516 organization. *Geoscientific Model Development* **9**, 1937–1958 (2016).
- 517 62. China National People's Congress (NPC). Interpretation of the Law of the People's Republic of China on Prevention and  
518 Control of Desertification, Chapter II Planning for Prevention and Control of Desertification.  
519 [http://www.npc.gov.cn/npc/c2181/flsyywd\\_list.shtml](http://www.npc.gov.cn/npc/c2181/flsyywd_list.shtml) (2003).
- 520 63. Wang, X. M., Zhang, C. X., Hasi, E. & Dong, Z. B. Has the Three Norths Forest Shelterbelt Program solved the desertification  
521 and dust storm problems in arid and semiarid China? *Journal of Arid Environments* **74**, 13–22 (2010).
- 522 64. Bryan, B. A. *et al.* China's response to a national land-system sustainability emergency. *Nature* **559**, 193–204 (2018).
- 523 65. PRC National Development and Reform Commission (NDRC). Planning of Beijing-Tianjin Sandstorm Source Control  
524 Program (2001-2010). [https://www.ndrc.gov.cn/fggz/fztlgh/gjjzxgh/200709/t20070928\\_1196575\\_ext.html](https://www.ndrc.gov.cn/fggz/fztlgh/gjjzxgh/200709/t20070928_1196575_ext.html) (2007).
- 525 66. Yin, R. & Yin, G. China's primary programs of terrestrial ecosystem restoration: initiation, implementation, and challenges.  
526 *Environ. Manage* **45**, 429–441 (2010).
- 527 67. Yin, Y., Hou, Y., Langford, C., Bai, H. & Hou, X. Herder stocking rate and household income under the Grassland Ecological  
528 Protection Award Policy in northern China. *Land Use Policy* **82**, 120–129 (2019).
- 529 68. Sun, J. *et al.* Reconsidering the efficiency of grazing exclusion using fences on the Tibetan Plateau. *Science Bulletin* **65**, 1405–  
530 1414 (2020).
